1 **Two novel 7-*epi*-zingiberene derivatives with biological activity from *Solanum***  
2 ***habrochaites* are produced by a single cytochrome P450 monooxygenase**

3 Sebastian Zabel<sup>1#</sup>, Wolfgang Brandt<sup>2</sup>, Andrea Porzel<sup>2</sup>, Benedikt Athmer<sup>1</sup>, Ruy Kortbeek<sup>3</sup>, Petra  
4 Bleeker<sup>3</sup> and Alain Tissier<sup>1\*</sup>

5 <sup>1</sup> Department of Cell and Metabolic Biology, Leibniz-Institute of Plant Biochemistry, Halle,  
6 Germany

7 <sup>2</sup> Department of Bioorganic Chemistry, Leibniz-Institute of Plant Biochemistry, Halle, Germany

8 <sup>3</sup> Swammerdam Institute for Life Sciences, Green Life Sciences research cluster, University of  
9 Amsterdam, Netherlands

10 #current address: IDT Biologika Deutschland, Dessau-Rosslau, Germany

11 Author for correspondence: Alain Tissier, [alain.tissier@ipb-halle.de](mailto:alain.tissier@ipb-halle.de)

12

13 **Abstract**

14 Secretions from glandular trichomes potentially protect the plant against a variety of  
15 aggressors. In the tomato genus, wild species constitute a rich source of chemical diversity  
16 produced at the leaf surface by glandular trichomes. Previously, *7-epi*-zingiberene produced  
17 in several accessions of *Solanum habrochaites* was found to confer resistance to whiteflies  
18 (*Bemisia tabaci*) and other insect pests. Here, we identify two derivatives of *7-epi*-zingiberene  
19 from *S. habrochaites* that had not been reported as yet. We identified them as 9-hydroxy-  
20 zingiberene and 9-hydroxy-10,11-epoxyzingiberene. Using a combination of genetics and  
21 transcriptomics we identified a single cytochrome P450 oxygenase, ShCYP71D184 that  
22 carries out two successive oxidations to generate the two sesquiterpenoids. Bioactivity assays  
23 showed that only 9-hydroxy-10,11-epoxyzingiberene exhibits substantial toxicity against *B.*  
24 *tabaci*. In addition, both 9-hydroxy-zingiberene and 9-hydroxy-10,11-epoxyzingiberene display  
25 substantial growth inhibitory activities against a range of microorganisms, including *Bacillus*  
26 *subtilis*, *Phytophthora infestans* and *Botrytis cinerea*. Our work shows that trichome secretions  
27 from wild tomato species can provide protection against a wide variety of organisms. In  
28 addition, the availability of the genes encoding the enzymes for the pathway of *7-epi*-  
29 zingiberene derivatives makes it possible to introduce this trait in cultivated tomato by precision  
30 breeding.

## 31 Introduction

32 The plant surface constitutes the first barrier against aggressions of various kinds, including  
33 pathogens and herbivores. In the aerial parts, different kinds of protuberances at the surface  
34 differentiate and contribute to the protection of plants against different types of stresses. The  
35 most prominent of these are trichomes, which are uni- or multicellular structures derived from  
36 the epidermis that can either be glandular or non-secreting. Glandular trichomes typically  
37 contain one to several highly metabolically active cells dedicated to the production of large  
38 quantities of secondary metabolites. The compounds produced can be either stored in a  
39 specialized cavity, which is typical for volatiles, or secreted onto the leaf surface as in the case  
40 of the resinous acyl sugars or diterpenoids in several Solanaceae species. In the tomato  
41 genus, including in the cultivated and related wild species, different types of glandular  
42 trichomes specialized in the production of distinct classes of substances can be found. Type  
43 I/IV trichomes typically produce acyl sugars, which are directly secreted from the tip of the  
44 glandular cells (King et al., 1990; Schillmiller et al., 2012). Type VI glandular trichomes  
45 constitute one of the most abundant types and in cultivated tomato, *Solanum lycopersicum*,  
46 their main products are monoterpenes (Schillmiller et al., 2009). Whereas little, if any, variation  
47 in the composition of the type VI secretion has been reported within *S. lycopersicum*  
48 accessions, related species, in particular *Solanum habrochaites*, display an impressive  
49 diversity of chemotypes (Gonzales-Vigil et al., 2012). Except in some accessions of *S.*  
50 *habrochaites* ssp. *glabratum*, where the main compounds produced are methyl ketones, which  
51 are fatty acid derivatives (Farrar and Kennedy, 1987; Fridman et al., 2005), monoterpenoids  
52 and sesquiterpenoids are the major substances produced by type VI trichomes. Based on the  
53 nature of the farnesyl diphosphate (FDP) precursor two main classes of sesquiterpenoids have  
54 been described. Class I sesquiterpenoids are synthesized from the cytosolic *trans,trans*-FDP  
55 (*E,E*-FDP) and consist of a mixture of various germacrene sesquiterpenes, as well as farnesoic  
56 and/or dehydro-farnesoic acids in some accessions (Snyder et al., 1993; Breeden et al., 1996;  
57 van Der Hoeven et al., 2000). Class II sesquiterpenes are derived from the *cis,cis*-FDP  
58 precursor (*Z,Z*-FDP) and are produced in the plastids (Sallaud et al., 2009). Until now two

59 sesquiterpene synthases able to convert *Z,Z*-FPP have been identified in *S. habrochaites*. The  
60 santalene and bergamotene synthase (ShSBS) is a multiproduct cyclase which makes (+)- $\alpha$ -  
61 santalene, (+)-*endo*- $\beta$ -bergamotene, and (-)-*endo*- $\beta$ -bergamotene as well as other minor  
62 products (Sallaud et al., 2009). The other sesquiterpene cyclase (ShZS) synthesizes 7-*epi*-  
63 zingiberene (**Figure 1**, peak 1) as the main product, which can spontaneously oxidize to *ar*-  
64 curcumene (Bleeker et al., 2012; Gonzales-Vigil et al., 2012). Accessions that make santalene  
65 and bergamotene do not produce 7-*epi*-zingiberene and *vice versa*, indicating that the  
66 corresponding enzymes are encoded by alleles of the same gene (Gonzales-Vigil et al., 2012).  
67 The santalene and bergamotene sesquiterpenes are further oxidized to carboxylic acids, which  
68 are, in some accessions such as LA1777, by far the most abundant compounds produced in  
69 type VI trichomes, with amounts that can reach tens of mg per leaf fresh weight (Frelichowski  
70 and Juvik, 2005). For all these compounds, activities towards various insect herbivores could  
71 be demonstrated. For example, the sesquiterpene carboxylic acids from LA1777 were shown  
72 to confer resistance against two lepidopteran pests, *Helicoverpa zea* and *Spodoptera exigua*  
73 (Frelichowski and Juvik, 2001). 7-*epi*-zingiberene seems to confer a particularly broad range  
74 of resistance against various pests, including pinworms (*Tuta absoluta*), whiteflies (*Bemisia*  
75 *tabaci*), spider mite (*Tetranychus evansi*), and Colorado potato beetle (*Leptinotarsa*  
76 *decemlineata*) (Carter et al., 1989; Maluf et al., 2001; Freitas et al., 2002; de Azevedo et al.,  
77 2003; Goncalves et al., 2006; Maluf et al., 2010). Transformation of cultivated tomato (*S.*  
78 *lycopersicum*) with the two genes required for the biosynthesis of 7-*epi*-zingiberene also  
79 resulted in improved insect-resistance due to an increased repellence of whiteflies and toxicity  
80 to spidermites (Bleeker et al., 2012).

81 While surveying the exudate profiles of various accessions of *S. habrochaites*, we noted the  
82 presence of additional peaks in accession LA2167 that were suggested to be derivatives of 7-  
83 *epi*-zingiberene based on their mass fragmentation pattern. We describe the structure  
84 elucidation of these compounds based on a combination of mass spectrometry, nuclear  
85 magnetic resonance spectroscopy (NMR) and circular dichroism. The derivatives were  
86 identified as (4*R*,7*R*,9*S*)-7-*epi*-9-hydroxy-zingiberene and (4*R*,7*R*,9*S*,10*S*)-7-*epi*-9-hydroxy-

87 10,11-epoxy-zingiberene. Furthermore, using genetic and transcriptomics approaches we  
88 could identify a single gene coding for a cytochrome P450 oxygenase that was responsible for  
89 their biosynthesis. Finally, bioassays for antibacterial, fungicide and insecticide activities  
90 showed that these compounds display a range of biological activities, supporting their role in  
91 the defense of tomato plants against various pests.

92

## 93 **Results**

### 94 **Identification and structure elucidation of two novel 7-*epi*-zingiberene derivatives**

95 A metabolic profiling survey of different accessions from the wild tomato *Solanum habrochaites*  
96 revealed two novel major peaks in leaf surface extracts of LA2167 measured by GC-MS  
97 (**Figure 1**). The mass spectra of these compounds did not yield any convincing match in the  
98 NIST database, indicating that these might be novel compounds. However, the spectra did  
99 present significant similarities to that of 7-*epi*-zingiberene, suggesting they might be derivatives  
100 thereof, with a molecular mass of 220 for compound **2** and 236 for compound **3** (**Figure 1**).  
101 This increase in molecular mass corresponds to one and two oxygen atoms for **2** and **3**,  
102 respectively, and is consistent with increased retention times upon gas chromatography. To  
103 further characterize these compounds, leaf surface extracts were derivatized by silylation and  
104 analyzed by GC-MS. Derivatization of **2** afforded a mass spectrum with a molecular ion of 292,  
105 a base peak of 197 and distinct m/z signals of 277 and 157 (**Supplemental Figure 1A**). These  
106 signals could be accounted for by the presence of a single hydroxyl group at C9 as seen in  
107 **Supplemental Figure 2**. Silylation of **3** increased the molecular mass by only 72, indicating  
108 that only one silylation had occurred (**Supplemental Figure 1B**). Since **3** has two additional  
109 oxygen atoms, this suggests that one of them is not available for derivatization and therefore  
110 could be, for example, present as an epoxide. One interpretation of the fragmentation pattern  
111 suggests the presence of a hydroxyl group at position 9, as in **2**, and of an epoxide between  
112 C10 and C11, instead of the double bond present in zingiberene for **3** (**Supplemental Figure**  
113 **3**).

114 We purified **2** and **3** they from hexane extracts made from approximately 1000 leaves of *S.*  
115 *habrochaites* LA2167 in a single step on an open 50 mL silica column (see methods section  
116 and **Supplemental Figure 4**). After purification, 21 mg of **2** and 25 mg of **3** were recovered. **2**  
117 and **3** were analyzed by electrospray high resolution mass spectrometry (ESI-HRMS) in the  
118 positive mode giving monoisotopic molecular masses of 221.1900 and 237.1849 respectively,  
119 confirming the predicted formula C<sub>15</sub>H<sub>24</sub>O for **2** and C<sub>15</sub>H<sub>24</sub>O<sub>2</sub> for **3** (**Supplemental Figures 5**  
120 **and 6, Supplemental Tables 1 and 2**).

121 The structures of **2** and **3** were elucidated on the basis of extensive 1D (<sup>1</sup>H, <sup>13</sup>C) and 2D (COSY,  
122 HSQC, HMBC,) NMR spectroscopic analysis. The <sup>13</sup>C and DEPT spectra (**Table 1**) of **2**  
123 exhibited signals for four methyl, two methylene and seven methine groups as well as two  
124 quaternary carbons. As can be seen from their low-field <sup>13</sup>C chemical shifts, the quaternary (δ  
125 <sup>13</sup>C 133.9, 131.2 ppm) and four of the tertiary carbons (δ <sup>13</sup>C 129.8, 129.6, 128.8, 120.9 ppm)  
126 belong to double bond units. One of the two remaining methine groups shows a hydroxyl  
127 substituent (δ <sup>13</sup>C 67.0 ppm; δ <sup>1</sup>H 4.356 ppm). Detailed analysis of <sup>1</sup>H,<sup>1</sup>H COSY and <sup>1</sup>H,<sup>13</sup>C  
128 HMBC 2D spectra (**Supplemental Figure 7** and **Table 1**) and comparison with literature data  
129 (Ishii et al., 2011) revealed **2** to be 9-hydroxy-7-epi-zingiberene, which we henceforth refer to  
130 as 9HZ (**Figure 2**).

131 The molecular formula of **3** established by ESI-HRMS is C<sub>15</sub>H<sub>24</sub>O<sub>2</sub>, indicating one additional  
132 oxygen atom but the same number of four double bond equivalents as 9HZ. The NMR spectra  
133 of **3** largely resemble those of 9HZ (**Table 2**). However, the signals of CH-10 (δ <sup>13</sup>C 128.9 ppm;  
134 δ <sup>1</sup>H 5.110 ppm) and C-11 (δ <sup>13</sup>C 133.9 ppm) in 9HZ are replaced in **3** by signals at δ <sup>13</sup>C 68.1  
135 ppm; δ <sup>1</sup>H 2.558 ppm and δ <sup>13</sup>C 58.9 ppm, respectively. The coupling constant of C-10/H-10  
136 was extracted from the residual <sup>1</sup>J correlation peak in the HMBC spectrum. Its size of 170 Hz  
137 with simultaneous high-field shift of H-10 clearly shows CH-10 to be involved in an epoxy unit.  
138 The structure of **3** was thus established as 9-hydroxy-10,11-epoxy-zingiberene, which we now  
139 refer to as 9H10epoZ (**Figure 2**). Notably, the NMR data was not sufficient to determine the  
140 absolute configuration of 9HZ and 9H10epoZ. This could be addressed after identification of  
141 the enzyme responsible for their synthesis (see below).

142

143 **Identification of a candidate gene for the biosynthesis of the oxidized zingiberene**  
144 **derivatives**

145 To identify the genes involved in the biosynthesis of the two zingiberene derivatives, 9HZ and  
146 9H10EPOZ, two complementary approaches were used: transcriptomics and genetics. For  
147 transcriptomics, RNA microarray hybridization was performed on different accessions of *S.*  
148 *habrochaites* that differ in their sesquiterpene composition. Among those that we selected,  
149 LA2167 is the only one that produces the oxidized zingiberenoids. We searched for genes  
150 annotated as oxidases, particularly cytochrome P450 oxygenases (CYPs) that are  
151 overexpressed in LA2167 compared to the other accessions. This analysis produced a set of  
152 three CYP-encoding genes, one of which showed a particularly strong expression in LA2167,  
153 *Sohab01g008670* (defined by similarity to the *Solyc01g008670* gene of *S. lycopersicum*)  
154 (**Figure 3**). The expression of this gene was then verified by quantitative RT-PCR, which  
155 confirmed the particularly high expression of *Sohab01g008670* in accession LA2167 (**Figure**  
156 **3**).

157 In parallel, we generated a backcross population (BC1F1) (n=150) between *S. habrochaites*  
158 LA2167 and *S. lycopersicum* LA4024, using LA4024 as the recurrent parent. F1 plants  
159 exhibited an exudate profile that was a combination of that of both parents, including 9HZ and  
160 9H10epoZ, indicating that the biosynthesis of the zingiberene derivatives is a dominant trait.  
161 Profiling of the exudate of the 150 BC1 plants by GC-MS showed a mendelian segregation for  
162 zingiberene and its derivatives (see **Table 3**). Notably, both zingiberene derivatives strictly co-  
163 segregated indicating that a single locus was responsible for the biosynthesis of these  
164 compounds. Furthermore, approximately half of the zingiberene producing lines also produced  
165 the zingiberene derivatives, demonstrating that these two loci are not linked. The BC1  
166 population was genotyped using a set of 115 markers distributed over the 12 chromosomes.  
167 Linking the presence of 9HZ and 9H10EPOZ to genetic markers indicated that the locus for  
168 the biosynthesis of the zingiberene derivatives is on chromosome 1, in a region that includes  
169 *Sohab01g008670* (see **Supplemental Table 1** for the full set of data). Combined with the gene

170 expression analysis, the genetic mapping data provided strong support for Sohab01g008670  
171 as the gene responsible for the oxidation of zingiberene. According to the cytochrome P450  
172 oxygenase nomenclature, Sohab01g008670 was named ShCYP71D184.

173

#### 174 **ShCYP71D184 is a zingiberene oxidase (ShZO)**

175 To evaluate the enzymatic activity of ShCYP71D184, we expressed the full-length coding  
176 sequence transiently in *Nicotiana benthamiana* together with the enzymes required for the  
177 production of 7-*epi*-zingiberene (hereafter 7epiZ), namely the *Z,Z*-FPP synthase (zFPS) and  
178 the 7-*epi*-zingiberene synthase (ZS) from *S. habrochaites* (Sallaud et al., 2009; Bleeker et al.,  
179 2012). Leaf surface extracts of agro-infiltrated *N. benthamiana* leaves were analyzed by GC-  
180 MS five days after infiltration. We detected 7epiZ and small amounts of *ar*-curcumene in leaf  
181 surface extracts of *N. benthamiana* leaves expressing zFPS and ZS (**Figure 4**). When  
182 ShCYP71D184 was co-expressed with zFPS and ZS, several additional peaks appeared in  
183 the GC-MS chromatogram. Comparison with a leaf surface extract of LA2167 revealed that  
184 both 9HZ and 9H10epoZ were present (**Figure 4 and Supplemental Figure 8**). There was  
185 one additional major peak, whose abundance varied between repetitions, but it was typically  
186 higher than 9H10epoZ. This unidentified product is also present in LA2167 leaf surface  
187 extracts, although there it is less abundant than 9HZ and 9H10epoZ (Compound 6 in **Figure**  
188 **4**). The similarity of the mass spectrum of the unidentified compound to that of *ar*-curcumene  
189 and its molecular mass of 234 (**Supplemental Figure 8**) suggest it could be 9-hydroxy-10,11-  
190 epoxy-curcumene. The absence of these zingiberene oxidation products in all other enzyme  
191 combinations or controls therefore confirms the function of ShCYP71D184 as a zingiberene  
192 oxidase, henceforth abbreviated as ShZO. A phylogenetic analysis of ShZO shows that it is  
193 most closely related to CYP71 enzymes from the Solanaceae, such as premnaspirodiene  
194 oxygenase (CYP71D55) and *epi*-aristolochene 1,3-dihydroxylase (CYP71D20)  
195 (**Supplemental Figure 9**). Notably, both CYP71D55 and CYP71D20 carry out successive  
196 oxidations of sesquiterpenes (Ralston et al., 2001; Takahashi et al., 2005; Takahashi et al.,  
197 2007).



198

## 199 **Determination of the absolute configuration of 9HZ and 9H10epoZ by modelling**

200 The NMR data did not allow us to determine the absolute configuration of 9HZ and 9H10epoZ.

201 In the absence of crystals, which could have been used for X-ray spectroscopy, we decided to

202 tackle this issue by two modelling approaches. The first consists in the comparison of simulated

203 of circular dichroism (CD) spectra with the actual measured spectra, and the second involves

204 substrate docking simulations on a modelled 3D structure of ShZO. Previous work established

205 the absolute configuration of 7epiZ at carbon 4 as *R* (Bleeker et al., 2011). None of the

206 calculated CD-spectra with the *S4* configuration fit the measured spectra, thus confirming the

207 determination of configuration by Bleeker et al. (2011). Calculated CD-spectra for 9HZ with the

208 configurations with *R4*, *R7*,*R9* and *R4*, *S7*,*R9* (**Supplemental Figures 10a** and **10c**) do not fit

209 the experimental spectra and can therefore be rejected. The configuration with *R4*,*R7*,*S9*

210 (**Supplemental Figure 10b**) fits slightly better than the one with *R4*,*S7*,*S9* (**Supplemental**

211 **Figure 10d**). In the case of 9H10epoZ, out of all eight configurations only *R4*,*S7*,*R9*,*S10*

212 (**Supplemental Figure 11f**) can be excluded. This is in agreement with the poor fit for *R4*,

213 *S7*,*R9* of 9HZ (see above). All other configurations fit rather nicely with the respective

214 experimental spectra (**Supplemental Figure 11**). Taking into account that 9H10epoZ is

215 derived from 9HZ and that the simulated CD spectra of the *R4*,*R7*,*R9* and *R4*,*S7*,*R9*

216 configurations do not fit, the configurations with *R4*,*R7*,*R9*,*S10* or *R10* and *R4*,*S7*,*R9*,*R10* of

217 9H10epoZ are very unlikely to be correct. Thus, for 9H10epoZ four structures, with

218 *R4*,*R7*,*S9*,*S10*, *R4*,*R7*,*S9*,*R10*, *R4*,*S7*,*S9*,*S10* and *R4*,*S7*,*S9*,*R10* configurations, remain

219 possible.

220 To determine which configurations for 9HZ and 9H10epoZ are most likely correct, we

221 performed protein homology modelling for ShZO. Systematic docking studies for both

222 compounds (9HZ and 9H10epoZ) with all configurations tested for the CD spectra simulations

223 (*R4* stays fixed), including equatorial as well as axial orientation of the side chain with respect

224 to the ring system, were carried out. The structure of the protein model used is shown in

225 **Supplemental Figure 11**. The docking studies with all possible stereoisomers of zingiberene,

226 show that the *R4,R7* configuration is the only one adopting a docking pose with a short distance  
227 between a hydrogen atom bound to C9 and the reactive oxygen atom bound to the heme  
228 (**Figure 5A**). In all other configurations, docking arrangements with the cyclohexadiene ring  
229 moiety in proximity to the heme do not allow oxidation at C9. This is caused by the shape of  
230 the hydrophobic binding pocket formed mainly by L208, I116, V117, L362, and V363. In the  
231 case of the docked *4R,7R*-zingiberene, the proS H9 is at a distance of 2.5 Å, whereas the proR  
232 hydrogen is at a distance of 3.9 Å. Thus, the formation of *4R,7R,9S*-hydroxy-zingiberene is  
233 highly favored. This conclusion is strongly supported by the results of the docking studies for  
234 9-hydroxy-zingiberene with the *7R, 9R-*, *7S, 9S-*, and *7S, 9R-* configurations. Only in the case  
235 of *4R,7R,9S*-hydroxy-zingiberene does the docking pose (**Figure 5B**) allow an oxidation at the  
236 C10 atom exactly in the same orientation as that found for *4R,7R*-zingiberene. Due to the  
237 orientation of the butene moiety, fixed by the restriction of accessible space caused by the  
238 spatially neighboring L208, the formation of *4R,7R,9S*-hydroxy-10*S*,11-epoxy-zingiberene is  
239 the only possibility (**Figure 5C**).

240 Thus, in summary and in agreement with the calculated CD-spectra, it is very likely that  
241 *4R,7R,9S*-hydroxy-zingiberene and *4R,7R,9S*-hydroxy-10*S*,11-epoxy-zingiberene are the  
242 enzymatically formed compounds (**Figure 5D-F**).

243

#### 244 **9-hydroxy-10,11-epoxyzingiberene exhibits toxicity against whiteflies**

245 Next, we sought to evaluate the activity of these novel zingiberene derivatives towards  
246 whiteflies. To investigate the insecticidal properties of 7-*epi*-zingiberene and its derivatives, a  
247 series of no-choice whitefly bioassays were conducted using a realistic range of concentrations  
248 of the different fractionated compounds, applied to cultivated tomato leaf-discs. Concentrations  
249 were based on the quantities measured on the surface of *S. habrochaites* leaves (1-50 µg/cm<sup>2</sup>  
250 for 7*epi*Z and 0.4-12 and 0.4-5 µg/cm<sup>2</sup> for 9HZ and 9H10epoZ respectively). 48 Hours after  
251 exposure to individual treatments, the proportion of surviving whiteflies per cage was  
252 determined (**Supplemental Table 2**). Surprisingly, 7*epi*Z, the compound previously shown to  
253 be involved in whitefly resistance in *S. habrochaites* PI127826 (Bleeker et al., 2012), did not

254 affect whitefly survival, even when applied at relatively high concentrations (**Figure 6**). In  
255 contrast, 9H10epoZ caused a significant and concentration-dependent reduction in whitefly  
256 survival (ANOVA, LDS post-hoc  $p < 0.01$ ). This effect was however not found for 9HZ (**Figure**  
257 **6**) and it appears therefore to be a very specific response.

258

### 259 **7-epi-zingiberene and its derivatives have moderate antimicrobial activities**

260 To evaluate the activity of 7epiZ, 9HZ and 9H10epoZ against microorganisms we performed  
261 growth inhibition assays with the bacterium *Bacillus subtilis*, the oomycete *Phytophthora*  
262 *infestans*, and the fungi *Botrytis cinerea* and *Zymoseptoria triticii*. All three compounds display  
263 growth inhibition activities against *B. subtilis*, with the strongest effect for 9H10epoZ and the  
264 weakest for 7epiZ (**Figure 7A**). Half-maximal response, or IC<sub>50</sub> values, are 10.5  $\mu\text{M}$ , 13.6  $\mu\text{M}$   
265 and 34.6  $\mu\text{M}$  for 9H10epoZ, 9HZ and 7epiZ respectively. In contrast, in the assays with *P.*  
266 *infestans* only 9H10epoZ proves significantly active with an IC<sub>50</sub> value of 55.8  $\mu\text{M}$ , while 9HZ  
267 provides inhibition only at the highest concentration (200  $\mu\text{M}$ ) and 7epiZ has no inhibitory effect  
268 (**Figure 7B**). For *Z. triticii* a similar picture emerges, with 9H10epoZ being the most active  
269 compound with an IC<sub>50</sub> of 33.0  $\mu\text{M}$  (**Figure 7C**). Finally, against *Botrytis cinerea*, 9H10epoZ  
270 is again the most active compound with an IC<sub>50</sub> of 21  $\mu\text{M}$ , while 9HZ and 7epiZ display an  
271 IC<sub>50</sub> of 33.9 and 43.1  $\mu\text{M}$  respectively.

272

### 273 **Discussion**

274 Insect pests represent a significant threat for food security. Currently, in the majority of cases,  
275 they are dealt with by spraying synthetic insecticides, which are oftentimes not species-specific  
276 and therefore equally affect pests and beneficial insects, such as bees. This, and additional  
277 concerns regarding their impact on human health has led to the ban of some of these  
278 pesticides, such as the neo-nicotinoids, by environmental protection agencies in Europe and  
279 elsewhere  
280 ([https://ec.europa.eu/food/plant/pesticides/approval\\_active\\_substances/approval\\_renewal/ne](https://ec.europa.eu/food/plant/pesticides/approval_active_substances/approval_renewal/neonicotinoids_en)  
281 [onicotinoids\\_en](https://ec.europa.eu/food/plant/pesticides/approval_active_substances/approval_renewal/neonicotinoids_en)). Furthermore, intensive use of these chemicals leads to the emergence of

282 resistance in insect populations, rendering them ineffective. There is, therefore, a need for  
283 alternative strategies that limit the use of synthetic insecticides. One such an approach relies  
284 on the application of natural enemies of insects, such as parasitic wasps or pathogenic  
285 microorganisms (Lacey et al., 2015; Turlings and Erb, 2018). These strategies can work well  
286 with low levels of pest infestations but fail to cope with massive increase in populations under  
287 specific environmental circumstances. Another approach relies on the implementation of  
288 natural defenses of plants. In tomato, there is abundant literature highlighting the role of  
289 glandular trichome secretions in protecting plants against herbivore pests (Glas et al., 2012).  
290 However, these resistance traits are found exclusively in wild relatives of tomato. Breeding  
291 such metabolite traits into cultivated tomato is a challenging task because they are highly  
292 polygenic. First, specialized metabolites produced by plants are typically the products of  
293 pathways involving multiple enzymes. Although the underlying genes can be clustered in the  
294 genome as has been shown for a number of plant specialized metabolite pathways (Nutzmann  
295 et al., 2016; Nützmann et al., 2018), this is not always the case. Here, we show that the gene  
296 coding for zingiberene oxidase is on chromosome 1 in a different locus than the two genes  
297 required for the production of 7epiZ, which are clustered on chromosome 8. Secondly, as  
298 mentioned earlier, these metabolites are produced and stored in specialized tissues.  
299 Therefore, additional factors including trichome type, density and productivity need to be  
300 considered. There is strong support for a positive correlation between the level of resistance  
301 and the density of trichomes, which need to be of the correct type producing the compounds  
302 that are required for resistance. Tomato has four different types of glandular trichomes, with  
303 type I/IV producing acyl sugars and type VI terpenoids. The nature of the secretion by type VII  
304 trichomes is not clearly established, although analogous trichomes in tobacco produce  
305 antifungal peptides (Shepherd et al., 2005). Concerning type VI trichomes, a number of genes  
306 involved in their development have been identified (Schuurink and Tissier, 2020), but, to the  
307 best of our knowledge, genes controlling their density are not known yet. QTL analysis in  
308 crosses between *S. galapagense* and *S. lycopersicum* allowed the identification of a major  
309 locus on chromosome 2 contributing to both insect resistance and type IV trichome density

310 together with the production of acyl sugars, but the genes still remain to be identified (Firdaus  
311 et al., 2013; Vosman et al., 2019). Yet another aspect is the capacity to produce and  
312 accumulate large quantities of specialized metabolites in trichomes. In some *S. habrochaites*  
313 accessions sesquiterpenoids produced by type VI trichomes can represent more 10% of the  
314 leaf dry weight (Frelichowski and Juvik, 2005), which is not explained only by the higher density  
315 of trichomes, but by the fact each trichome produces significantly more terpenes than in the  
316 cultivated tomato (Balcke et al., 2017). This could be due to the level of expression of the  
317 biosynthesis genes (Ben-Israel et al., 2009) but also to the capacity of type VI trichomes to  
318 store the metabolites in a cavity located between the glandular cells (Bergau et al., 2015;  
319 Bennewitz et al., 2018).

320 Here we identified two novel derivatives of 7-*epi*-zingiberene (7*epi*Z), 9-hydroxy-zingiberene  
321 (9HZ) and 9-hydroxy-10,11-epoxy-zingiberene (9H10epoZ) and the gene encoding  
322 ShCYP71D184, a P450 monooxygenase enzyme responsible for the biosynthesis of these two  
323 sesquiterpenoids in *S. habrochaites* LA2167. Although the absolute configuration of 9HZ and  
324 9H10epoZ could not be determined directly, we inferred it by a combination of modeling the  
325 CD-spectra and docking 9HZ in the active site of ShCYP71D184. Based on these modeling  
326 approaches the only possible configurations were (4*R*,7*R*,9*S*)-7-*epi*-9-hydroxy-zingiberene  
327 and (4*R*,7*R*,9*S*,10*S*)-7-*epi*-9-hydroxy-10,11-epoxy-zingiberene. Direct demonstration of the  
328 absolute configuration of these compounds would require chemical synthesis or crystallization.  
329 In a recent publication Dawood and Snyder (2020) concluded that *S. habrochaites* contains  
330 9HZ and 9H10epoZ based on spectral comparison with results that we released previously in  
331 a patent application (Dawood and Snyder, 2020).

332 Zingiberene-type sesquiterpenes have been identified in a number of plant and insect species.  
333 In ginger (*zingiber officinale*),  $\alpha$ -zingiberene has a distinct configuration (4*R*, 7*S*) (Soffer and  
334 Burk, 1985) than 7-*epi*-zingiberene (4*R*, 7*R*) in *S. habrochaites* (Breedon and Coates, 1994).  
335 Ginger also produces *cis*- and *trans*-zingiberenol (also named bisabolanol) which are  
336 sesquiterpene alcohols with a hydroxyl group at position 1 instead of the double bond between  
337 C1 and C6 that is present in zingiberene (Khrimian et al., 2015). A mixture of stereoisomers of

338 zingiberenols (*1RS,4RS,7S*) are sex pheromones produced by males of the rice stink bug  
339 (*Oebalus poecilus*) (de Oliveira et al., 2013) and interestingly two zingiberenol derivatives  
340 (*1S,4S,7R,10S* and *1R,4S,7R,10S*) carrying an epoxide at position 10, like 9H10epoZ, are  
341 aggregation pheromones of the marmorated stink bug (*Halyomorpha halys*) (Khrimian et al.,  
342 2014). Marmorated stink bug is an emerging pest that is causing severe damage on a variety  
343 of fruit trees and horticultural crops (Haye and Weber, 2017). Although these pheromones  
344 have a different stereochemistry than the tomato zingiberene derivatives identified here, they  
345 support the importance of zingiberene-type compounds as insect pheromones. So far, no  
346 semiochemical has been identified for whiteflies (*Bemisia tabaci* and *Trialeurodes*  
347 *vaporariorum*) (Schlaeger et al., 2018) and it would be interesting to study the effect of the  
348 compounds identified here on the behavior of these important pests as well as other tomato  
349 herbivores.

350 The assays performed here point to a specific toxicity of one of the derivatives, namely  
351 9H10epoZ, to which a clear, concentration dependent effect was observed against *B. tabaci*  
352 (**Figure 6**). The concentrations used were in line with the wild-tomato leaf surface. Thus, *S.*  
353 *habrochaites* LA2167 produces both a repellent (7epiZ) (Bleeker et al., 2011) and a compound  
354 that is toxic to whiteflies. Whereas it was previously assumed that wild tomato volatile  
355 sesquiterpenes inform the insect about the presence of lethal doses of the compound prior to  
356 landing {Bleeker, 2011 #5481}, here we show that 7epiZ, even at high concentrations, is not  
357 toxic to *B. tabaci*. Instead, the repellent volatile may signal the presence of a toxic derivative  
358 on the leaf surface. Previously we showed however that 7epiZ is toxic to spider mites using  
359 transgenic tomato lines that do not produce derivatives (Bleeker et al., 2012), further  
360 underlining the insect specificity of individual metabolites.

361 Furthermore, the 7epiZ derivatives and 9H10epoZ in particular, also showed moderate anti-  
362 microbial activity against several known plant micro-organisms including important pathogens  
363 like *B. cinerea* and *P. infestans* (**Figure 7**). *B. cinerea* and *P. infestans* are known tomato  
364 pathogens but *Z. triticii* is not. Thus, the anti-microbial activity of 9H10epoZ does not seem to  
365 be specifically directed against tomato pathogens. It remains debatable whether this anti-

366 microbial activity is relevant in the field. In *S. habrochaites* LA1777 we previously estimated  
367 the amount of sesquiterpenes produced to be around 65 ng per type VI trichome (Balcke et  
368 al., 2017). Given that the head of type VI trichomes in *S. habrochaites* has a diameter of around  
369 65  $\mu\text{m}$  and that the volume of the storage cavity represents 65% of the trichome head (Bergau  
370 et al., 2015; Balcke et al., 2017), the average volume of the storage cavity is 93 465  $\mu\text{m}^3$ .  
371 Assuming that terpene production in LA2167 is equivalent to that of LA1777, this would  
372 correspond to a total sesquiterpene concentration of 3.1 M, or 1.03 M per sesquiterpene  
373 (7epiZ, 9HZ and 9H10epoZ, average MW= 220 Da) in the storage cavity, based on  
374 approximately equal concentration of the three major sesquiterpenes (see **Figure 1**). Thus,  
375 when the trichome head is ruptured, relatively high concentrations of these compounds are  
376 released, which could indeed exert inhibitory effects on pathogens present. Quantitative  
377 resistance to *P. infestans* was found in different accessions of *S. habrochaites* with QTLs  
378 located on chromosome 11 and 5 (Johnson et al., 2012; Haggard et al., 2013, 2014; Copati et  
379 al., 2019). These were done with LA1777 not with LA2167 however and further investigation  
380 on a putative contribution of sesquiterpenes of LA2167 to quantitative resistance to microbial  
381 pathogens should be carried out in the future.

382 In conclusion, we identified 7epiZ oxidation products and the enzyme responsible for their  
383 biosynthesis from an accession of the wild tomato *S. habrochaites*. This information can be  
384 used to breed tomato lines with improved performance against pests by reconstituting the  
385 whole pathway either by classical breeding, transgenesis or the CRISPR-Cas9-based knock-  
386 in technology (Dahan-Meir et al., 2018). Of these, the CRISPR-Cas9 approach is probably the  
387 most promising as it should lead to optimal gene expression levels and avoid the introgression  
388 of large chromosomal fragments around the genes of interest from *S. habrochaites*, which can  
389 lead to negative side-effects.

390

## 391 **Materials and Methods**

### 392 **Plant Material and Growth**



393 Seeds of *Solanum habrochaites* accessions LA2167, LA1777, LA1753, LA2650 and *S.*  
394 *lycopersicum* accession LA4024 were obtained from the Tomato Genetics Resource Center  
395 at UC Davis (<http://tgrc.ucdavis.edu/>). *S. habrochaites* accession PI 127826 was obtained from  
396 the USDA Germplasm (<https://www.ars-grin.gov/>). Plants were grown in a greenhouse with  
397 controlled conditions of 25°C and 55% humidity during the day, and 20°C and 75% humidity  
398 during the night. Plants were illuminated for 16 h (from 6:00 am to 10:00 pm) resulting in a light  
399 intensity of 5 to 25 Klux depending on weather conditions. The plants were watered once a  
400 week with a fertilizer solution (0.1% Kamasol Brilliant Blau, Compo Expert GmbH, Germany).

401

#### 402 **Trichome Harvest**

403 Leaves from 5-6 week old plants were removed from the plants and immediately brushed  
404 several times across the surface with a paint brush dipped in liquid N<sub>2</sub> while keeping it right  
405 above a mortar containing liquid N<sub>2</sub>. The collection of trichomes from 20-30 leaves was  
406 sufficient to extract total RNA for cDNA synthesis. The harvested material was filtered through  
407 a steel sieve of 150 µm diameter (Atechnik, Leinburg, Germany) to further separate the  
408 isolated glandular trichomes from leaf debris and to eliminate non-glandular trichomes. After  
409 N<sub>2</sub> evaporation, the collected trichomes were transferred with a cooled down spatula into a 1.5  
410 mL reaction tube and stored at -80°C until further processing.

411

#### 412 **RNA isolation and cDNA synthesis**

413 RNA-isolation of leaf and trichome material from tomato plants was done using the RNeasy  
414 Mini Kit (Qiagen, Germany). The RNA concentration was measured with a Nanodrop  
415 spectrophotometer (Thermo Fisher Scientific) and the quality of the RNA was controlled with  
416 the QIAxcel Advanced system (Qiagen).

417 A DNase I digest was done using the Ambion DNA-free™ kit (Life Technologies – Carlsbad,  
418 USA) and 1 µg of total RNA and 1 µL of oligo-18dT primer was used for cDNA synthesis as  
419 follows. Nuclease-free water was added to a final reaction volume of 12 µL. Then 4 µL 5 x  
420 reaction buffer, 1 µL Ribolock RNase inhibitor, 2 µL deoxynucleotides (dNTPs) and 1 µL of



421 RevertAid H Minus-MuLV reverse transcriptase (ThermoFisher Scientific) were added to a final  
422 volume of 20  $\mu$ L. The mixture was then incubated at 42°C for 1 h and heated to 70°C for 10  
423 min. The resulting cDNA was ready-to-use for PCR amplification reaction and for qRT-PCR  
424 expression analysis.

425

#### 426 **Polymerase-chain reaction (PCR)**

427 For DNA amplification from genomic DNA, cDNA or plasmid DNA for later cloning procedures  
428 different polymerase-chain reaction (PCR) methods were used. KOD Hot Start DNA  
429 Polymerase (KOD) (Sigma-Aldrich), Phusion high fidelity DNA polymerase (Phusion) (New  
430 England Biolabs) and the proofreading DreamTaq DNA-Polymerase (DreamTaq) (Thermo  
431 Fisher Scientific) were used following manufacturer's recommendations. The following  
432 temperature program was applied including an initial denaturation step of 2 min at 95 °C and  
433 then 30-35 cycles of 30 s denaturation at 95°C, a 30 s annealing step at 55°C and elongation  
434 for 0.5 min/kb (KOD) or 1 min/kb (DreamTaq) gene length at 72°C with 5 min final extension  
435 step at 72°C. Oligonucleotide primers used for PCR amplification are listed in the  
436 Supplemental Data.

437

#### 438 **Quantitative Real-Time PCR (qRT-PCR)**

439 The *qRT-PCR* analysis was done with a Connect 96x Real-Time PCR system (BioRad). Input  
440 of each reaction was 3  $\mu$ L of the cDNA reaction diluted 20 times. The reaction was done with  
441 the my-Budget 5x EvaGreen QPCR Mix II (Bio&Sell). The following program was applied  
442 including an initial denaturation step of 15 min at 95°C followed by 40 cycles with 10 s at 95°C  
443 and 20 s at 55°C. The melt curve was recorded after additional denaturing at 95°C for 30 s,  
444 cooling down to 65°C for 30s and heating up again to 95°C 0.1°C/s. The analysis was done  
445 with the Bio-Rad CFX manager software. For high-resolution melt (HRM) analysis gDNA (10  
446 ng/ $\mu$ l) was used and the temperature program adjusted to 95°C for 15 min followed by 40  
447 cycles with 10s at 95°C, 20s at 60°C and 72°C for 30s. In this case an extended melt curve  
448 was obtained by heating up to 95°C for 1 min, cooling down to 60 °C, 1 min hold at 60°C,

449 followed by heating from 70 to 90°C at 0.01°C/s. The data was analyzed with the Precision  
450 Melt Analysis program (BioRad). The complete list of oligonucleotides used is provided in the  
451 Supplemental Data.

452

### 453 **cDNA Microarray hybridization**

454 cDNA from leaves of the *S. habrochaites* accessions LA1753, LA2167, LA1777, LA2556 and  
455 LA2650 was hybridized to a custom designed microarray chip and the data analyzed as  
456 described in Balcke et al. (2017). Only the data for three genes are shown in **Figure 3A**.

457

### 458 ***S. habrochaites* LA2167 x *S. lycopersicum* LA4024 back-cross population and molecular 459 mapping**

460 To generate a back-cross population between accession LA2167 (*S. habrochaites*) and  
461 LA4024 (*S. lycopersicum*), pollen from the anthers of the stamen (male) of LA2167 was  
462 collected on a glass slide and used to pollinate emasculated flowers of LA4024. The procedure  
463 was repeated several times over 7 days to increase the chances of successful fertilization.  
464 Afterwards all flower parts from the cultivated tomato LA4024 except the pistil (female) were  
465 removed carefully and the collected pollen was transferred on to the stigma. This procedure  
466 was repeated several times with each pollinated flower over the following 7 days to ensure  
467 pollination. After fruit development all seeds were harvested and sowed after 1 week of drying  
468 at room temperature. The progeny was then analyzed by GC-MS and HRM analysis  
469 genotyping for at least 8 independent loci. Only plants that had zingiberene and its derivatives  
470 and were heterozygous for the markers were kept for the back-crosses. After flowering pollen  
471 of the F1 plants was collected and used to pollinate the cultivated tomato. Seeds were  
472 harvested and each BC1F1 plant was then individually characterized genotyped and analyzed  
473 by GC-MS as for the F1 plants. Plants that had the phenotype and genotype of LA4024, i.e.  
474 resulting from self-fertilization of LA4024, were discarded.

475

### 476 **Molecular mapping**

477 114 markers were used. The complete list is provided in **Supplemental Table 2**. 25 were High  
478 Resolution Melt (HRM) markers, the others were iPLEX™ assay markers. The iPLEX™ assays  
479 were performed at ATLAS-Biolabs (Germany). The High Resolution Melt assays were  
480 performed as described in Bennewitz et al. (2018).

481  
482 **Leaf surface extracts and analysis by GC-MS**  
483 Surface extracts were collected from 6 leaflets of circa 5 cm length by adding 2 ml n-hexane  
484 and shaking for 1 minute. The hexane was taken off and centrifuged at 16,000 x g for 90  
485 seconds to remove debris. 1 µl of the hexane supernatant was then injected in a Trace GC  
486 Ultra gas chromatograph coupled to an ISQ mass spectrometer (Thermo Scientific). GC-MS  
487 analyses were performed as described in Brückner et al. (Brückner et al., 2014).

488  
489 **Purification of 9HZ and 9H10epoZ**  
490 To get enough soluble material for normal solid phase extraction (SPE) chromatography and  
491 further experiments (bioassays and NMR analysis) around 500-1000 leaves of the *S.*  
492 *habrochaites* accession LA2167 were extracted with 500 mL of n-hexane for 5 min. The  
493 organic solvent was then gently removed by a rotary evaporation system Rotavapor R-114  
494 (Fluke, Germany) at room temperature. The dried sample was then resolved in 50 mL n-  
495 hexane and stored at -20°C. In parallel the SPE column was packed with 15 mg  
496 CHROMABOND silica adsorbent material (Machery-Nagel) and equilibrated several times with  
497 50 mL n-hexane. After preparation the sample was applied on to the column. Afterwards the  
498 column was washed six times with an 90:10:1 mixture of n-hexane:ethyl acetate:methanol. A  
499 second elution step was then carried out with a 50:50:1 mixture of n-hexane:ethyl  
500 acetate:methanol. 50 mL fractions were collected and cooled down at 4°C until further analysis.

501  
502 **Nuclear Magnetic Resonance Analysis**  
503 NMR spectra were recorded on an Agilent (Varian) VNMRS 600 NMR spectrometer at 599.832  
504 MHz (<sup>1</sup>H, <sup>2</sup>D) and 150.826 MHz (<sup>13</sup>C) using a 5 mm inverse detection cryoprobe. The samples

505 were dissolved in C<sub>6</sub>D<sub>6</sub>. Chemical shifts were referenced to internal TMS ( $\delta^1\text{H}$  0 ppm) and  
506 internal C<sub>6</sub>D<sub>6</sub> ( $\delta^{13}\text{C}$  128.0 ppm).

507

## 508 **Circular Dichroism**

509 CD spectra were recorded on a JASCO-J815 CD spectrometer using n-hexane as solvent.

510

## 511 **Molecular Cloning**

512 *Golden Gate* cloning was used for the preparation of all plasmid constructs reported here  
513 (Engler et al., 2008; Weber et al., 2011; Werner et al., 2012; Engler et al., 2014). The complete  
514 list of constructs used here is provided in the Supplemental Data. The zFPS coding sequence  
515 was codon optimized (see Supplemental Data) for *N. benthamiana*, while ShZS (Zingibernee  
516 synthase) and ShCYP71D184 were amplified as cDNA from LA2167.

517

## 518 **Transient expression in *Nicotiana benthamiana***

519 T-DNA constructs containing cDNAs for zFPS, ShZS, ShZO (CYP71D184) and the  
520 Arabidopsis cytochrome P450 reductase (ATR1) all under the control of the 35S promoter (see  
521 list of constructs in the **Supplemental Data**), were transformed into *Agrobacterium tumefaciens*  
522 strain GV3101 (pMP90) by electroporation. *A. tumefaciens* strains containing the respective  
523 T-DNA were grown in a 5 mL LB medium pre-culture for 24 h at 28°C under constant shaking  
524 at 180 rpm. 0.5 mL of this pre-culture was then used for inoculation of 50 mL LB medium and  
525 grown for 16 h at 28°C. The *A. tumefaciens* cells were then mixed up in different combinations  
526 of expression constructs and harvested by centrifugation for 30 min at 1800 g at 4°C at a global  
527 OD<sub>600</sub> of 0.6. In combinations with fewer genes, the mixture was complemented by the addition  
528 of an equivalent amount of an *A. tumefaciens* strain expressing GFP with the 35S promoter.  
529 The cells were resuspended in infiltration buffer (5% sucrose (w/v) and 4.3 g/L Murashige and  
530 Skoog basal salt mixture) containing 20  $\mu\text{M}$  acetosyringone. Leaves of 4-5-week old *N.*  
531 *benthamiana* plants were infiltrated by pressing a 1 mL syringe onto the abaxial side of the  
532 leaves followed by slowly injecting the *A. tumefaciens* suspension. After complete infiltration

533 of 3-4 leaves the plants were brought back into growth chambers for additional 5 days after  
534 which they were extracted for GC-MS analysis.

### 535 **Computational methods for the calculation of CD spectra**

536 Conformational analysis of all compounds under investigation was performed using MMFF94  
537 molecular mechanics force field (Halgren, 1999) and low-mode molecular dynamics  
538 simulations within the Molecular Operating Environment (MOE) software (v2015.10; Chemical  
539 Computing Group Inc.: Montreal, QC, Canada, 2015). The force field minimum energy  
540 structures were subsequently optimized by applying the density functional theory (DFT) using  
541 the BP86 functional with the def2-TZVPP basis set (Perdew, 1986; Becke, 1988; Schäfer et  
542 al., 1992; Weigend and Ahlrichs, 2005; Karton et al., 2008) implemented in the ab initio ORCA  
543 3.0.3 program package (Neese, 2012). The influence of the solvent n-hexane was included in  
544 the DFT calculations using the COSMO model (Sinnecker et al., 2006) to include any influence  
545 of the solvent. The quantum chemical simulation of the UV and CD spectra was also carried  
546 out using ORCA. Therefore, the first 50 excited states of each enantiomer and conformation  
547 were calculated by applying the long-range corrected hybrid functional TD CAM-B3LYP9 with  
548 the def2-TZVP(-f) and def2-TZVP/J basis sets (Perdew, 1986; Becke, 1988; Schäfer et al.,  
549 1992; Weigend and Ahlrichs, 2005; Karton et al., 2008). The CD curves were visualized with  
550 the help of the software SpecDis 1.64 (<https://specdis-software.jimdofree.com/>) (Bruhn et al.,  
551 2013) from the calculated rotatory strength values using a Gaussian distribution function at a  
552 half-bandwidth of  $\sigma = 0.3$  eV. The single spectra of the individual conformers were summed  
553 up according to their contribution to Boltzmann-statistical weighting (as derived from the single-  
554 point energy calculations), wavelength shifted, and compared with the experimental spectra.

555

### 556 **Protein Homology Modelling**

557 Protein homology modelling of ShCYP71D184 was automatically performed with YASARA  
558 (Krieger et al., 2009). After search for template proteins in the protein database (Berman et al.,  
559 2000), 100 models were created based on alternative sequence alignments including  
560 secondary structure predictions and comparisons with found appropriate X-ray protein

561 structures. The model based on the x-ray structure of 3CZH (CYP2R1) appeared as best  
562 model with a sequence identity of 28% and a sequence similarity of 44.9%. A final model was  
563 formed by merging short loop sequences from several other proteins. The quality of the model  
564 was checked for native folding by energy calculations with PROSA II (Sippl, 1990, 1993) and  
565 for stereo-chemical quality by PROCHECK (Laskowski et al., 1993). The Ramachandran plot  
566 showed 88.2 of all amino acid residues in most favored areas and five outliers located in loops  
567 outside the active site. All other stereo-chemical parameters are in allowed regions for good  
568 quality. The z-score value of -8.8 for combined potential pairs resulting from the PROSA  
569 analysis indicates a native like fold. In the final model, the co-substrate heme was automatically  
570 overtaken from the X-ray structure and was inserted in the model. Manually an oxygen atom  
571 was added to the in heme coordinated iron ion using the “molecular operating environment”  
572 program package MOE 2015.1001 (<https://www.chemcomp.com/>).

573 Energy optimized structures of zingiberene all four alternative configurations (except fixed R-  
574 configuration for C4, 7R and 7S zingiberene; 7R, 9R-, 7R, 9S-, 7S, 9R-, and 7S-9S- hydroxy-  
575 zingiberene) including for each an equatorial as well as an axial orientation of the side chain  
576 for both compounds were used for docking studies. Docking was performed with GOLD and  
577 chemscore scoring function allowing for each structure the output of 30 poses. For all optional  
578 parameters standard settings were applied. All these produced poses were analyzed by  
579 measuring the distances between the oxygen atom bound to iron and both hydrogen atoms at  
580 C9 (proS, and proR) in case of zingiberene and for hydroxy-zingiberene the distances to C10  
581 and C11.

582

### 583 ***Bemisia tabaci* toxicity assay**

584 SPE purified fractions were dried under N<sub>2</sub> and dissolved in 1.7 mM TritonX-100 followed by  
585 thorough mixing using a vortex. 20 µL of diluted fraction, containing the appropriate  
586 concentration of terpenoids, was applied to the abaxial side of freshly harvested leaf discs (1.5  
587 cm Ø) from five-week-old *S. lycopersicum* (cv. C32) plants. Leaf discs treated with 0 to 50 µg  
588 terpenoids per cm<sup>2</sup> (n = 5) were air dried for 30 minutes prior to starting the experiment. 15

589 whiteflies (*B. tabaci*) were collected from a cucumber rearing and placed in small containers  
590 (Greiner analyzer cups; 2.9 cm Ø x 5.2 cm) with a Ø 1 cm opening in the lid. The opening was  
591 covered with a leaf disc facing the treated side inside of the cup. The leaf disc was  
592 subsequently covered with moist filter paper (Whatman) and sealed with Parafilm®. Cages  
593 were placed for 48 hours in a climate chamber at 24°C where after dead and alive whiteflies  
594 were counted under a stereomicroscope. The survival rate per cage was determined and, by  
595 means of standardizing separate experiments, survival rates were calculated relatively to the  
596 mean survival of the mock controls.

597

### 598 **Antibacterial Assay**

599 To determine the antibacterial activity of 7epiZ and its derivatives, this assay was done with a  
600 genetically modified version of the gram-positive *Bacillus subtilis* strain 168 expressing the  
601 yellow-fluorescent protein YFP (Veening et al., 2004). This protein is under the control of the  
602 *abrB* promoter, which is only active during the exponential growth phase of *Bacillus subtilis*,  
603 which allows determining the exact number of bacteria and their vitality by direct fluorescence  
604 measurements. In this case the fluorescence could be used indirectly as a “benchmark” for the  
605 growth inhibition induced by the test compounds (Michels et al., 2015). The *Bacillus subtilis*  
606 168 strain was grown on TY media with 1% tryptone, 0.5% yeast extract, 1% NaCl and  
607 chloramphenicol (5 µg/ml) for selection. After overnight growth on solid media (1.5% agar)  
608 (Fluka) at 30 °C, pre-cultures (50 ml) for the antibacterial assay were inoculated from plate and  
609 incubated for 24 h at 30°C in liquid media without shaking. The cell density was adjusted to  
610  $1.6 \times 10^5$  cells/ml resuspended afterwards in 10 mL fresh TY media and used for the bacterial  
611 assay. The assay was done in black flat-bottom 96-well microtiter plates (BD Falcon). In  
612 addition to a negative control (300 µL TY media) four different controls were carried along with  
613 each plate. First the auto-fluorescence of the single compounds (K1, n = 1) was measured;  
614 then the bacterial suspension alone (K2, n = 6); the reference control was a mixture of pure  
615 methanol and inoculum (K3, n = 6) equivalent to 100% growth; Finally, K4 was a positive  
616 control containing erythromycin, a common antibiotic, which was dissolved in pure methanol.



617 The samples themselves were a mixture of the tested compound at different concentrations (1  
618 to 100  $\mu$ M) and the bacterial inoculum. The fluorescent measurement was done with a  
619 microtiter plate reader Tecan GENios Pro ( $\lambda_{ex}$  = 510 nm,  $\lambda_{em}$  = 535 nm, bandwidth=10 nm, gain  
620 45, 60, 10 flashes, integration time 40  $\mu$ s, 50% mirror, 3  $\times$  3 quadratic measurements per well,  
621 temperature 27  $^{\circ}$ C, shaking 10 s low intensity, settle time 1 s) at the time point  $t = 0$  ( $t_0$ ) after  
622 inoculation with *Bacillus subtilis* and again under the same specifications after 15 h ( $t_{15}$ )  
623 incubation at 30  $^{\circ}$ C. Further calculations of the percentage of growth inhibition relative to K3  
624 were done referring to the following equation 1: growth inhibition [%] =  $(1 - 100 \times (x_{sample} [t_{15}-$   
625  $t_0] / x_{k3} [t_{15}-t_0])) \times 100$

626

### 627 **Assays for Growth Inhibition of Plant Pathogens**

628 The strains used were *Botrytis cinerea* Pers., *Septoria tritici* Desm., and *Phytophthora*  
629 *infestans* Mont. and the assays were performed in 96-well microtiter plate assay. The  
630 experimental setup was done according the fungicide resistance action committee FRAC  
631 ([www.frac.info/](http://www.frac.info/)). Except some minor modifications in the protocol. 7-epi-zingiberene, 9-  
632 hydroxy-zingiberene and 9-hydroxy-10,11-epoxy-zingiberene were tested in a dilution series  
633 of a stock solution from 0.52  $\mu$ g/ml to 42  $\mu$ g/mL t. The compounds were diluted in DMSO with  
634 a final concentration of 2.5% in the assay. Additionally, DMSO was also used as negative  
635 control, whereas pyraclostrobin (Sigma-Aldrich), which is a commercially available fungicide,  
636 was used as positive control. For each concentration three biological replicates were  
637 measured. Pathogenic growth was determined by measuring the optical density (OD) at  $\lambda =$   
638 405 nm 7 days after inoculation with a microtiter plate reader GENios Pro (Tecan) doing 5  
639 measurements per well using multiple reads with 3  $\times$  3 quadratic measurements per well).

640

### 641 **Acknowledgments**

642 We would like to thank the IPB for funding this project and the greenhouse personnel of the  
643 IPB (Petra Jansen, Philip Plato and Sabine Voigt) for taking care of the plants.

644



645 **Author contributions**

646 The project was conceived and supervised by AT. SZ performed the identification and  
647 purification of the zingiberene derivatives, generated the backcross population, analyzed the  
648 BC1F1 plants by GC-MS and carried out the molecular mapping and all the cloning and the  
649 transient expression in *N. benthamiana*. WB did the CD-spectrum simulation and the 3D-  
650 protein modeling and docking. AP performed the NMR analysis. BA provided support for the  
651 design of molecular markers. RK and PB performed the whitefly assays. AT wrote the  
652 manuscript, which all authors revised and approved.

653

654 **Conflict of interest**

655 The authors declare no conflict of interest.

656

657 **Tables**

658 **Table 1. NMR data of Compound 2 (solvent: C<sub>6</sub>D<sub>6</sub>; numbering scheme see Figure 2)**

| Pos. | $\delta^{13}\text{C}$ [ppm] | $\delta^1\text{H}$ [ppm] m (J [Hz])                   | HMBC correlation<br>H to C |
|------|-----------------------------|-------------------------------------------------------|----------------------------|
| 1    | 131.2                       | ---                                                   |                            |
| 2    | 128.8                       | 5.829 ddd (9.7/3.4/1.7)                               | 3, 4, 6                    |
| 3    | 129.6                       | 5.684 dd (9.7/3.4)                                    | 1, 2, 4, 5, 7              |
| 4    | 38.7                        | 2.377 m                                               |                            |
| 5    | 26.5                        | 2.04 <sup>a</sup>                                     | 1, 3, 4, 6, 7              |
| 6    | 120.9                       | 5.427 m                                               | 15                         |
| 7    | 33.5                        | 1.66 <sup>a</sup>                                     | 3, 4, 5, 8, 14             |
| 8    | 42.3                        | 1.553 ddd (13.4/7.2/5.2);<br>1.496 ddd (13.4/8.6/6.7) | 4, 7, 9, 10, 14            |
| 9    | 67.0                        | 4.356 ddd (8.7/7.2/6.7)                               | 11                         |
| 10   | 129.8                       | 5.110 d sept(8.7/1.4)                                 | 12, 13                     |
| 11   | 133.9                       | ---                                                   |                            |
| 12   | 25.7                        | 1.557 d (1.4)                                         | 10, 11, 13                 |
| 13   | 18.0                        | 1.475 d (1.4)                                         | 10, 11, 12                 |
| 14   | 17.6                        | 0.910 d (6.8)                                         | 4, 7, 8                    |
| 15   | 21.2                        | 1.663 br s                                            | 1, 2, 6                    |

659 <sup>a</sup>  $^1\text{H}$  chemical shift extracted from the HSQC spectrum

660

661

662

663

664 **Table 2. NMR data of Compound 3 (solvent: C<sub>6</sub>D<sub>6</sub>; numbering scheme see Figure 2)**

665

| Pos.            | $\delta^{13}\text{C}$ [ppm] | $\delta^1\text{H}$ [ppm] m (J [Hz])                   | HMBC correlation H to C |
|-----------------|-----------------------------|-------------------------------------------------------|-------------------------|
| 1               | 131.2                       | ---                                                   |                         |
| 2               | 129.0                       | 5.822 ddd (9.8/3.4/1.7)                               | 1, 4, 6, 15             |
| 3               | 129.0                       | 5.618 dd (9.8/3.3)                                    | 1, 4, 5, 6, 7           |
| 4               | 37.8                        | 2.346 d                                               | 3, 9                    |
| 5               | 26.6                        | 2.02 <sup>a</sup>                                     | 1, 3, 4, 6, 7           |
| 6               | 121.0                       | 5.419 m                                               | 4, 5, 15                |
| 7               | 32.9                        | 1.748 m                                               | 4, 5, 8, 9, 14          |
| 8               | 38.4                        | 1.476 ddd (14.0/6.6/5.2);<br>1.435 ddd (14.0/8.3/7.0) | 4, 7, 9, 10, 14         |
| 9               | 69.0                        | 3.442 ddd (8.3/7.8/5.2)                               | 7, 8, 10, 11            |
| 10              | 68.1                        | 2.558 d (7.8)                                         | 8, 9, 11, 12            |
| 11              | 58.9                        | ---                                                   |                         |
| 12 <sup>b</sup> | 24.8                        | 1.058 s                                               | 10, 11, 13              |
| 13 <sup>b</sup> | 19.4                        | 1.046 s                                               | 10, 11, 12              |
| 14              | 18.2                        | 0.906 d (6.9)                                         | 4, 7, 8                 |
| 15              | 21.2                        | 1.663 br s                                            | 1, 2, 6                 |

666 <sup>a</sup>  $^1\text{H}$  chemical shift extracted from the HSQC spectrum; <sup>b</sup> may be interchanged

667

668 **Table 3. Segregation of 7-*epi*-zingiberene, 9HZ and 9H10epoZ in the backcross**  
 669 **population**

670

| Metabolite                 | Number of backcross plants |    |    | Chi-Square test (n=1) |
|----------------------------|----------------------------|----|----|-----------------------|
|                            | 73                         | 41 | 36 |                       |
| 7- <i>epi</i> -zingiberene | -                          | +  | +  | 0.75                  |
| 9HZ                        | -                          | -  | +  | 0.53                  |
| 9H10epoZ                   | -                          | -  | +  |                       |

671

## 672 Figure legends

673 **Figure 1. GC-MS analysis of leaf surface extracts of *Solanum habrochaites* LA2167. (A)**

674 GC-MS total ion chromatogram (TIC) of a leaf surface hexane extract of *S. habrochaites*

675 LA2167. Peak 1 is 7-*epi*-zingiberene, peaks 2 and 3 are zingiberene derivatives which are

676 characterized in this work, peak 4 is germacrene B. (B) Mass spectrum of 7-*epi*-zingiberene.

677 (C) Mass spectrum of 2. (D) Mass spectrum of 3. The insert is a zoomed-in section between

678 m/z 200 and 240.

679

680 **Figure 2. Structure of compounds 2 and 3 as determined by NMR spectroscopy. 2 and 3**

681 were determined to be 9-hydroxy-zingiberene (9HZ) and 9-hydroxy-10,11-epoxy-zingiberene

682 respectively.

683

684 **Figure 3. Expression of CYP-encoding candidate genes for the oxidation of zingiberene**  
685 **in various *S. habrochaites* accessions. A.** Microarray data of 3 CYP encoding genes in 5  
686 different accessions. LA2167 is the only accession that produces zingiberene and associated  
687 derivatives. Intensity designates the normalized fluorescence signal from the microarray **B.**  
688 qRT-PCR of Sohab01g008670 in different tomato accessions. Hybrid designates F1 plants of  
689 a cross between LA2167 (*S. habrochaites*) and LA4024 (*S. lycopersicum*).

690

691 **Figure 4. Expression of ShZS and ShCYP71D184 in *Nicotiana benthamiana*.** The gene  
692 combinations indicated at the right of each chromatogram were agro-infiltrated in *N.*  
693 *benthamiana* and leaf extracts analysed by GC-MS. The portion of the chromatograms  
694 covering sesquiterpenes is shown. LA2167: leaf surface extracts of *S. habrochaites* LA2167.  
695 zFPS: *cis,cis*-farnesyl diphosphate synthase; ZS: zingiberene synthase; ZO: ShCYP71D184  
696 (zingiberene oxidase). The detected compounds are labelled as follows. 1: 7-epizingiberene;  
697 2: 9-hydroxy-zingiberene; 3: 9-hydroxy-10,11-epoxyzingiberene; 4: ar-curcumene; 5: farnesol;  
698 6: unknown compound, tentatively identified as 9-hydroxy-10,11-epoxy-ar-curcumene

699

700 **Figure 5. Determination of the absolute configuration of 9HZ and 9H10epoZ by**  
701 **molecular docking.** The only possible docking arrangement of (4*R*,7*R*)-zingiberene to the  
702 active site of ShZO (ShCYP71D184) from *S. habrochaites* LA2167 is shown in **A** The proS 9-  
703 hydrogen atom is in close distance (2.5 Å, red dotted line) to the reactive oxygen atom bound  
704 to the heme, favoring the formation of (4*R*,7*R*,9*S*)-9-hydroxy-zingiberene. The only possible  
705 docking pose of (4*R*,7*R*,9*S*)-9-hydroxy-zingiberene to the active site of ShZO is shown in **B**. It  
706 is in good agreement with the docking pose calculated independently for (4*R*,7*R*)-zingiberene.  
707 The reactive oxygen atom bound to heme is in close distance (3.4 Å) to the C10 carbon atom  
708 to favor the formation of the epoxide with *S10* only. **C:** Formed (4*R*,7*R*,9*S*,10*S*)-9-hydroxy-  
709 10,11-epoxy-zingiberene in the active site. **D:** (4*R*,7*S*)-zingiberene. **E:** (4*R*,7*R*,9*S*)-9-  
710 hydroxyzingiberene. **F:** (4*R*,7*R*,9*S*,10*S*)-9-hydroxy-10,11-epoxy-zingiberene.

711

712 **Figure 6: Whitefly toxicity assays of 4R,7R-zingiberene and its oxidized derivatives.**

713 Whitefly survival rates after 48 hours on treated leaf discs were normalised to the mean survival  
714 of the mock treatment (0 µg /cm<sup>2</sup>). Individual data points represent the average relative survival  
715 rate over 5 leaf discs ± SE.

716

717 **Figure 7: growth inhibition assays of 7epiZ, 9HZ and 9H10epiZ against various**

718 **microorganisms. A: Assays against *Bacillus subtilis*. B: assays against *Phytophthora infestans*.**

719 **C: assays against *Zymoseptoria triticii*. D. Assays against *Botrytis cinerea*.**

720

721 **References**

722

723 **Balcke, G.U., Bennewitz, S., Bergau, N., Athmer, B., Henning, A., Majovsky, P., Jiménez-**  
724 **Gómez, J.M., Hoehenwarter, W., and Tissier, A. (2017).** Multi-Omics of Tomato  
725 Glandular Trichomes Reveals Distinct Features of Central Carbon Metabolism  
726 Supporting High Productivity of Specialized Metabolites. *The Plant cell* **29**, 960-983.

727 **Becke, A.D. (1988).** Density-functional exchange-energy approximation with correct  
728 asymptotic behavior. *Physical Review A* **38**, 3098-3100.

729 **Ben-Israel, I., Yu, G., Austin, M.B., Bhuiyan, N., Aldridge, M., Nguyen, T., Schauvinhold,**  
730 **I., Noel, J.P., Pichersky, E., and Fridman, E. (2009).** Multiple Biochemical and  
731 Morphological Factors Underlie the Production of Methylketones in Tomato Trichomes.  
732 *Plant physiology* **151**, 1952-1964.

733 **Bennewitz, S., Bergau, N., and Tissier, A. (2018).** QTL Mapping of the Shape of Type VI  
734 Glandular Trichomes in Tomato. *Front. Plant Sci.* **9**.

735 **Bergau, N., Bennewitz, S., Syrowatka, F., Hause, G., and Tissier, A. (2015).** The  
736 development of type VI glandular trichomes in the cultivated tomato *Solanum*  
737 *lycopersicum* and a related wild species *S. habrochaites*. *BMC plant biology* **15**.

738 **Berman, H.M., Westbrook, J., Feng, Z., Gilliland, G., Bhat, T.N., Weissig, H., Shindyalov,**  
739 **I.N., and Bourne, P.E. (2000).** The Protein Data Bank. *Nucleic acids research* **28**, 235-  
740 242.

741 **Bleeker, P.M., Mirabella, R., Diergaarde, P.J., VanDoorn, A., Tissier, A., Kant, M.R., Prins,**  
742 **M., de Vos, M., Haring, M.A., and Schuurink, R.C. (2012).** Improved herbivore  
743 resistance in cultivated tomato with the sesquiterpene biosynthetic pathway from a wild  
744 relative. *Proceedings of the National Academy of Sciences of the United States of*  
745 *America* **109**, 20124-20129.

746 **Bleeker, P.M., Diergaarde, P.J., Ament, K., Schutz, S., Johne, B., Dijkink, J., Hiemstra,**  
747 **H., de Gelder, R., de Both, M.T.J., Sabelis, M.W., Haring, M.A., and Schuurink,**  
748 **R.C. (2011).** Tomato-produced 7-epizingiberene and R-curcumene act as repellents to  
749 whiteflies. *Phytochemistry* **72**, 68-73.

750 **Bredden, D.C., and Coates, R.M. (1994).** 7-Epizingiberene, a Novel Bisabolane  
751 Sesquiterpene from Wild Tomato Leaves. *Tetrahedron* **50**, 11123-11132.

752 **Bredden, D.C., Young, T.E., Coates, R.M., and Juvik, J.A. (1996).** Identification and  
753 bioassay of kairomones for *Helicoverpa zea*. *Journal of chemical ecology* **22**, 513-539.

- 754 **Brückner, K., Bozic, D., Manzano, D., Papaefthimiou, D., Pateraki, I., Scheler, U., Ferrer,**  
755 **A., de Vos, R.C., Kanellis, A.K., and Tissier, A.** (2014). Characterization of two genes  
756 for the biosynthesis of abietane-type diterpenes in rosemary (*Rosmarinus officinalis*)  
757 glandular trichomes. *Phytochemistry* **101**, 52-64.
- 758 **Bruhn, T., Schaumlöffel, A., Hemberger, Y., and Bringmann, G.** (2013). SpecDis:  
759 quantifying the comparison of calculated and experimental electronic circular dichroism  
760 spectra. *Chirality* **25**, 243-249.
- 761 **Carter, C.D., Sacalis, J.N., and Gianfagna, T.J.** (1989). Zingiberene and resistance to  
762 Colorado potato beetle in *Lycopersicon hirsutum* f. *hirsutum*. *Journal of Agricultural and*  
763 *Food Chemistry* **37**, 206-210.
- 764 **Copati, M.G.F., Alves, F.M., Dariva, F.D., Pessoa, H.P., Dias, F.O., Carneiro, P.C.S.,**  
765 **Carneiro, D.J.H., and Nick, C.** (2019). Resistance of the wild tomato *Solanum*  
766 *habrochaites* to *Phytophthora infestans* is governed by a major gene and polygenes.  
767 *An Acad Bras Cienc* **91**, e20190149.
- 768 **Dahan-Meir, T., Filler-Hayut, S., Melamed-Bessudo, C., Bocobza, S., Czosnek, H.,**  
769 **Aharoni, A., and Levy, A.A.** (2018). Efficient in planta gene targeting in tomato using  
770 geminiviral replicons and the CRISPR/Cas9 system. *The Plant journal : for cell and*  
771 *molecular biology* **95**, 5-16.
- 772 **Dawood, M.H., and Snyder, J.C.** (2020). The Alcohol and Epoxy Alcohol of Zingiberene,  
773 Produced in Trichomes of Wild Tomato, Are More Repellent to Spider Mites Than  
774 Zingiberene. *Front. Plant Sci.* **11**.
- 775 **de Azevedo, S.M., Faria, M.V., Maluf, W.R., de Oliveira, A.C.B., and de Freitas, J.A.** (2003).  
776 Zingiberene-mediated resistance to the South American tomato pinworm derived from  
777 *Lycopersicon hirsutum* var. *hirsutum*. *Euphytica* **134**, 347-351.
- 778 **de Oliveira, M.W., Borges, M., Andrade, C.K., Laumann, R.A., Barrigossi, J.A., and**  
779 **Blassioli-Moraes, M.C.** (2013). Zingiberenol, (1R,4R,1'S)-4-(1',5'-Dimethylhex-4'-  
780 enyl)-1-methylcyclohex-2-en-1-ol, identified as the sex pheromone produced by males  
781 of the rice stink bug *Oebalus poecilus* (heteroptera: pentatomidae). *J Agric Food Chem*  
782 **61**, 7777-7785.
- 783 **Engler, C., Kandzia, R., and Marillonnet, S.** (2008). A one pot, one step, precision cloning  
784 method with high throughput capability. *PloS one* **3**, e3647.
- 785 **Engler, C., Youles, M., Gruetzner, R., Ehnert, T.M., Werner, S., Jones, J.D., Patron, N.J.,**  
786 **and Marillonnet, S.** (2014). A golden gate modular cloning toolbox for plants. *ACS*  
787 *synthetic biology* **3**, 839-843.
- 788 **Farrar, R.R., and Kennedy, G.G.** (1987). 2-Undecanone, a Constituent of the Glandular  
789 Trichomes of *Lycopersicon-Hirsutum* F *Glabratum* - Effects on *Heliothis-Zea* and  
790 *Manduca-Sexta* Growth and Survival. *Entomologia Experimentalis Et Applicata* **43**, 17-  
791 23.
- 792 **Firdaus, S., van Heusden, A.W., Hidayati, N., Supena, E.D., Mumm, R., de Vos, R.C.,**  
793 **Visser, R.G., and Vosman, B.** (2013). Identification and QTL mapping of whitefly  
794 resistance components in *Solanum galapagense*. *TAG. Theoretical and applied*  
795 *genetics. Theoretische und angewandte Genetik* **126**, 1487-1501.
- 796 **Freitas, J.A., Maluf, W.R., Cardoso, M.D., Gomes, L.A.A., and Bearzotti, E.** (2002).  
797 Inheritance of foliar zingiberene contents and their relationship to trichome densities  
798 and whitefly resistance in tomatoes. *Euphytica* **127**, 275-287.
- 799 **Frelichowski, J.E., and Juvik, J.A.** (2001). Sesquiterpene carboxylic acids from a wild tomato  
800 species affect larval feeding behavior and survival of *Helicoverpa zea* and *Spodoptera*  
801 *exigua* (Lepidoptera : Noctuidae). *Journal of Economic Entomology* **94**, 1249-1259.
- 802 **Frelichowski, J.E., and Juvik, J.A.** (2005). Inheritance of sesquiterpene carboxylic acid  
803 synthesis in crosses of *Lycopersicon hirsutum* with insect-susceptible tomatoes. *Plant*  
804 *Breed.* **124**, 277-281.
- 805 **Fridman, E., Wang, J.H., Iijima, Y., Froehlich, J.E., Gang, D.R., Ohlrogge, J., and**  
806 **Pichersky, E.** (2005). Metabolic, genomic, and biochemical analyses of glandular  
807 trichomes from the wild tomato species *Lycopersicon hirsutum* identify a key enzyme  
808 in the biosynthesis of methylketones. *The Plant cell* **17**, 1252-1267.



- 809 **Glas, J.J., Schimmel, B.C., Alba, J.M., Escobar-Bravo, R., Schuurink, R.C., and Kant,**  
810 **M.R.** (2012). Plant glandular trichomes as targets for breeding or engineering of  
811 resistance to herbivores. *International journal of molecular sciences* **13**, 17077-17103.
- 812 **Goncalves, L.D., Maluf, W.R., Cardoso, M.D., de Resende, J.T.V., de Castro, E.M., Santos,**  
813 **N.M., do Nascimento, I.R., and Faria, M.V.** (2006). Relationship between zingiberene,  
814 foliar trichomes and repellence of tomato plant to *Tetranychus evansi*. *Pesquisa*  
815 *Agropecuaria Brasileira* **41**, 267-273.
- 816 **Gonzales-Vigil, E., Hufnagel, D.E., Kim, J., Last, R.L., and Barry, C.S.** (2012). Evolution of  
817 TPS20-related terpene synthases influences chemical diversity in the glandular  
818 trichomes of the wild tomato relative *Solanum habrochaites*. *Plant Journal* **71**, 921-935.
- 819 **Haggard, J.E., Johnson, E.B., and St Clair, D.A.** (2013). Linkage relationships among  
820 multiple QTL for horticultural traits and late blight (*P. infestans*) resistance on  
821 chromosome 5 introgressed from wild tomato *Solanum habrochaites*. *G3 (Bethesda,*  
822 *Md.)* **3**, 2131-2146.
- 823 **Haggard, J.E., Johnson, E.B., and St Clair, D.A.** (2014). Multiple QTL for horticultural traits  
824 and quantitative resistance to *Phytophthora infestans* linked on *Solanum habrochaites*  
825 chromosome 11. *G3 (Bethesda, Md.)* **5**, 219-233.
- 826 **Halgren, T.A.** (1999). MMFF VI. MMFF94s option for energy minimization studies. *Journal of*  
827 *Computational Chemistry* **20**, 720-729.
- 828 **Haye, T., and Weber, D.C.** (2017). Special issue on the brown marmorated stink bug,  
829 *Halyomorpha halys*: an emerging pest of global concern. *Journal of Pest Science* **90**,  
830 987-988.
- 831 **Ishii, T., Matsuura, H., Kaya, K., and Vairappan, C.S.** (2011). A new bisabolane-type  
832 sesquiterpenoid from *Curcuma domestica*. *Biochemical Systematics and Ecology* **39**,  
833 864-867.
- 834 **Johnson, E.B., Haggard, J.E., and St Clair, D.A.** (2012). Fractionation, stability, and isolate-  
835 specificity of QTL for resistance to *Phytophthora infestans* in cultivated tomato  
836 (*Solanum lycopersicum*). *G3 (Bethesda, Md.)* **2**, 1145-1159.
- 837 **Karton, A., Tarnopolsky, A., Lamère, J.-F., Schatz, G.C., and Martin, J.M.L.** (2008). Highly  
838 Accurate First-Principles Benchmark Data Sets for the Parametrization and Validation  
839 of Density Functional and Other Approximate Methods. Derivation of a Robust,  
840 Generally Applicable, Double-Hybrid Functional for Thermochemistry and  
841 Thermochemical Kinetics. *The Journal of Physical Chemistry A* **112**, 12868-12886.
- 842 **Khrimian, A., Shirali, S., and Guzman, F.** (2015). Absolute Configurations of Zingiberenols  
843 Isolated from Ginger (*Zingiber officinale*) Rhizomes. *Journal of natural products* **78**,  
844 3071-3074.
- 845 **Khrimian, A., Zhang, A.J., Weber, D.C., Ho, H.Y., Aldrich, J.R., Vermillion, K.E., Siegler,**  
846 **M.A., Shirali, S., Guzman, F., and Leskey, T.C.** (2014). Discovery of the Aggregation  
847 Pheromone of the Brown Marmorated Stink Bug (*Halyomorpha halys*) through the  
848 Creation of Stereoisomeric Libraries of 1-Bisabolen-3-ols. *Journal of natural products*  
849 **77**, 1708-1717.
- 850 **King, R.R., Calhoun, L.A., Singh, R.P., and Boucher, A.** (1990). Sucrose Esters Associated  
851 with Glandular Trichomes of Wild *Lycopersicon* Species. *Phytochemistry* **29**, 2115-  
852 2118.
- 853 **Krieger, E., Joo, K., Lee, J., Lee, J., Raman, S., Thompson, J., Tyka, M., Baker, D., and**  
854 **Karplus, K.** (2009). Improving physical realism, stereochemistry, and side-chain  
855 accuracy in homology modeling: Four approaches that performed well in CASP8.  
856 *Proteins* **77 Suppl 9**, 114-122.
- 857 **Lacey, L.A., Grzywacz, D., Shapiro-Ilan, D.I., Frutos, R., Brownbridge, M., and Goettel,**  
858 **M.S.** (2015). Insect pathogens as biological control agents: Back to the future. *J*  
859 *Invertebr Pathol* **132**, 1-41.
- 860 **Laskowski, R.A., MacArthur, M.W., Moss, D.S., and Thornton, J.M.** (1993). PROCHECK:  
861 a program to check the stereochemical quality of protein structures. *Journal of Applied*  
862 *Crystallography* **26**, 283-291.

- 863 **Maluf, W.R., Campos, G.A., and Cardoso, M.D.** (2001). Relationships between trichome  
864 types and spider mite (*Tetranychus evansi*) repellence in tomatoes with respect to foliar  
865 zingiberene contents. *Euphytica* **121**, 73-80.
- 866 **Maluf, W.R., Silva, V.D., Cardoso, M.D., Gomes, L.A.A., Neto, A.C.G., Maciel, G.M., and**  
867 **Nizio, D.A.C.** (2010). Resistance to the South American tomato pinworm *Tuta absoluta*  
868 in high acylsugar and/or high zingiberene tomato genotypes. *Euphytica* **176**, 113-123.
- 869 **Michels, K., Heinke, R., Schöne, P., Kuipers, O.P., Arnold, N., and Wessjohann, L.A.**  
870 (2015). A fluorescence-based bioassay for antibacterials and its application in  
871 screening natural product extracts. *J Antibiot (Tokyo)* **68**, 734-740.
- 872 **Neese, F.** (2012). The ORCA program system. *WIREs Computational Molecular Science* **2**,  
873 73-78.
- 874 **Nutzmann, H.W., Huang, A., and Osbourn, A.** (2016). Plant metabolic clusters - from  
875 genetics to genomics. *The New phytologist* **211**, 771-789.
- 876 **Nützmänn, H.W., Scazzocchio, C., and Osbourn, A.** (2018). Metabolic Gene Clusters in  
877 Eukaryotes. *Annu Rev Genet* **52**, 159-183.
- 878 **Perdew, J.P.** (1986). Density-functional approximation for the correlation energy of the  
879 inhomogeneous electron gas. *Physical Review B* **33**, 8822-8824.
- 880 **Ralston, L., Kwon, S.T., Schoenbeck, M., Ralston, J., Schenk, D.J., Coates, R.M., and**  
881 **Chappell, J.** (2001). Cloning, heterologous expression, and functional characterization  
882 of 5-epi-aristolochene-1,3-dihydroxylase from tobacco (*Nicotiana tabacum*). *Archives*  
883 *of biochemistry and biophysics* **393**, 222-235.
- 884 **Sallaud, C., Rontein, D., Onillon, S., Jabes, F., Duffe, P., Giacalone, C., Thoraval, S.,**  
885 **Escoffier, C., Herbette, G., Leonhardt, N., Causse, M., and Tissier, A.** (2009). A  
886 Novel Pathway for Sesquiterpene Biosynthesis from Z,Z-Farnesyl Pyrophosphate in  
887 the Wild Tomato *Solanum habrochaites*. *The Plant cell* **21**, 301-317.
- 888 **Schäfer, A., Horn, H., Ahrlichs, R., R., A., and R., T.P.** (1992). Fully optimized contracted  
889 Gaussian basis sets for atoms Li to Kr. *The Journal of Chemical Physics* **97**, 2571-  
890 2577.
- 891 **Schillmiller, A.L., Charbonneau, A.L., and Last, R.L.** (2012). Identification of a BAHD  
892 acetyltransferase that produces protective acyl sugars in tomato trichomes.  
893 *Proceedings of the National Academy of Sciences of the United States of America* **109**,  
894 16377-16382.
- 895 **Schillmiller, A.L., Chauvinhold, I., Larson, M., Xu, R., Charbonneau, A.L., Schmidt, A.,**  
896 **Wilkerson, C., Last, R.L., and Pichersky, E.** (2009). Monoterpenes in the glandular  
897 trichomes of tomato are synthesized from a neryl diphosphate precursor rather than  
898 geranyl diphosphate. *Proceedings of the National Academy of Sciences, USA* **106**,  
899 10865-10870.
- 900 **Schlaeger, S., Pickett, J.A., and Birkett, M.A.** (2018). Prospects for management of whitefly  
901 using plant semiochemicals, compared with related pests. *Pest management science*  
902 **74**, 2405-2411.
- 903 **Schuurink, R., and Tissier, A.** (2020). Glandular trichomes: micro-organs with model status?  
904 *The New phytologist* **225**, 2251-2266.
- 905 **Shepherd, R.W., Bass, W.T., Houtz, R.L., and Wagner, G.J.** (2005). Phylloplanins of tobacco  
906 are defensive proteins deployed on aerial surfaces by short glandular trichomes. *The*  
907 *Plant cell* **17**, 1851-1861.
- 908 **Sinnecker, S., Rajendran, A., Klamt, A., Diedenhofen, M., and Neese, F.** (2006).  
909 Calculation of Solvent Shifts on Electronic g-Tensors with the Conductor-Like  
910 Screening Model (COSMO) and Its Self-Consistent Generalization to Real Solvents  
911 (Direct COSMO-RS). *The Journal of Physical Chemistry A* **110**, 2235-2245.
- 912 **Sippl, M.J.** (1990). Calculation of conformational ensembles from potentials of mean force. An  
913 approach to the knowledge-based prediction of local structures in globular proteins. *J*  
914 *Mol Biol* **213**, 859-883.
- 915 **Sippl, M.J.** (1993). Recognition of errors in three-dimensional structures of proteins. *Proteins*  
916 **17**, 355-362.

- 917 **Snyder, J.C., Guo, Z.H., Thacker, R., Goodman, J.P., and Stpyrek, J.** (1993). 2,3-  
918 Dihydrofarnesoic Acid, a Unique Terpene from Trichomes of *Lycopersicon Hirsutum*,  
919 Repels Spider-Mites. *Journal of chemical ecology* **19**, 2981-2997.
- 920 **Soffer, M.D., and Burk, L.A.** (1985). The total stereostructure of (-)-isozingiberene  
921 dihydrochloride. *Tetrahedron Letters* **26**, 3543-3546.
- 922 **Takahashi, S., Zhao, Y., O'Maille, P.E., Greenhagen, B.T., Noel, J.P., Coates, R.M., and**  
923 **Chappell, J.** (2005). Kinetic and molecular analysis of 5-epiaristolochene 1,3-  
924 dihydroxylase, a cytochrome P450 enzyme catalyzing successive hydroxylations of  
925 sesquiterpenes. *Journal of Biological Chemistry* **280**, 3686-3696.
- 926 **Takahashi, S., Yeo, Y.S., Zhao, Y., O'Maille, P.E., Greenhagen, B.T., Noel, J.P., Coates,**  
927 **R.M., and Chappell, J.** (2007). Functional characterization of premnaspirodiene  
928 oxygenase, a cytochrome P450 catalyzing regio- and stereo-specific hydroxylations of  
929 diverse sesquiterpene substrates. *The Journal of biological chemistry* **282**, 31744-  
930 31754.
- 931 **Turlings, T.C.J., and Erb, M.** (2018). Tritrophic Interactions Mediated by Herbivore-Induced  
932 Plant Volatiles: Mechanisms, Ecological Relevance, and Application Potential. *Annual*  
933 *review of entomology* **63**, 433-452.
- 934 **van Der Hoeven, R.S., Monforte, A.J., Breeden, D., Tanksley, S.D., and Steffens, J.C.**  
935 (2000). Genetic control and evolution of sesquiterpene biosynthesis in *Lycopersicon*  
936 *esculentum* and *L. hirsutum*. *The Plant cell* **12**, 2283-2294.
- 937 **Veening, J.W., Smits, W.K., Hamoen, L.W., Jongbloed, J.D., and Kuipers, O.P.** (2004).  
938 Visualization of differential gene expression by improved cyan fluorescent protein and  
939 yellow fluorescent protein production in *Bacillus subtilis*. *Appl Environ Microbiol* **70**,  
940 6809-6815.
- 941 **Vosman, B., Kashaninia, A., Van't Westende, W., Meijer-Dekens, F., van Eekelen, H.,**  
942 **Visser, R.G.F., de Vos, R.C.H., and Voorrips, R.E.** (2019). QTL mapping of insect  
943 resistance components of *Solanum galapagense*. *TAG. Theoretical and applied*  
944 *genetics. Theoretische und angewandte Genetik* **132**, 531-541.
- 945 **Weber, E., Engler, C., Gruetzner, R., Werner, S., and Marillonnet, S.** (2011). A modular  
946 cloning system for standardized assembly of multigene constructs. *PloS one* **6**,  
947 e16765.
- 948 **Weigend, F., and Ahlrichs, R.** (2005). Balanced basis sets of split valence, triple zeta valence  
949 and quadruple zeta valence quality for H to Rn: Design and assessment of accuracy.  
950 *Physical Chemistry Chemical Physics* **7**, 3297-3305.
- 951 **Werner, S., Engler, C., Weber, E., Gruetzner, R., and Marillonnet, S.** (2012). Fast track  
952 assembly of multigene constructs using Golden Gate cloning and the MoClo system.  
953 *Bioeng Bugs* **3**, 38-43.

954

955



956 **Figure 1**

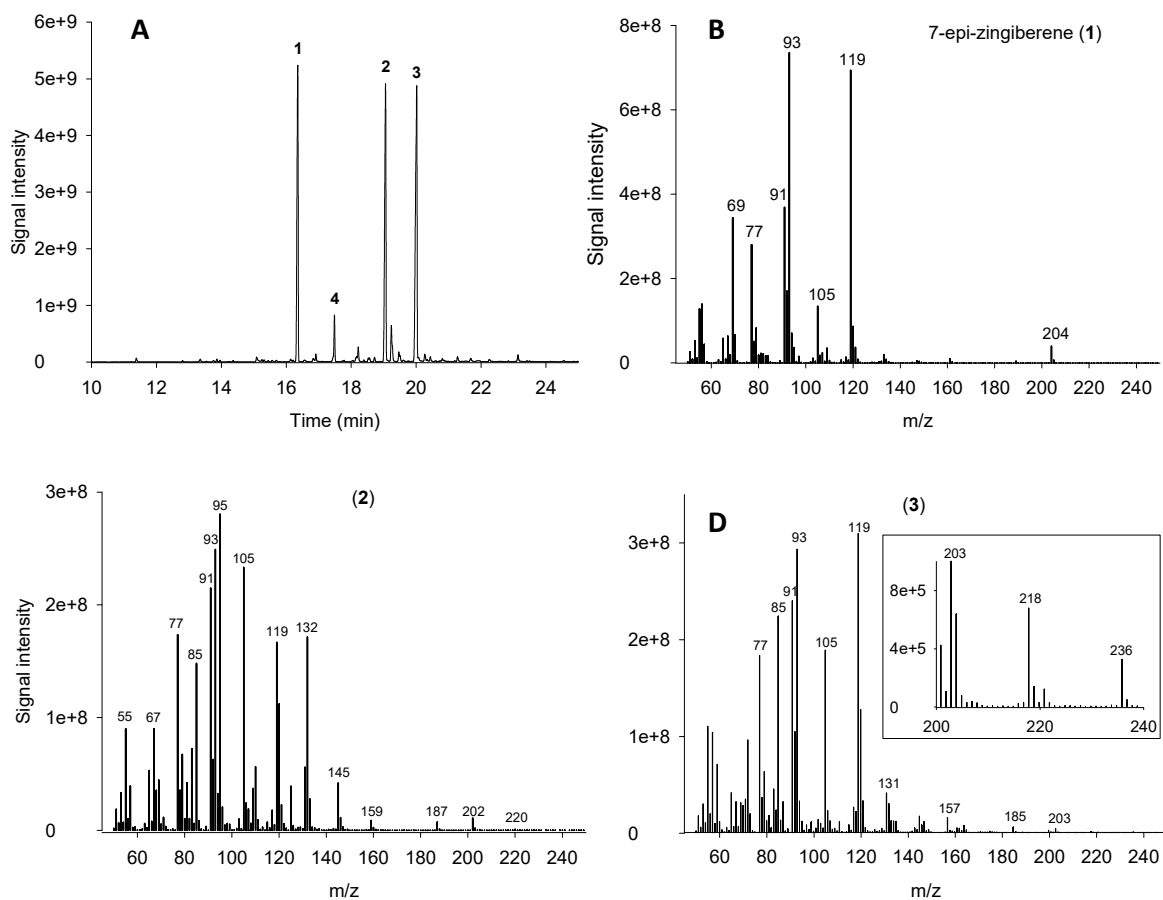

957

958

959 **Figure 2**

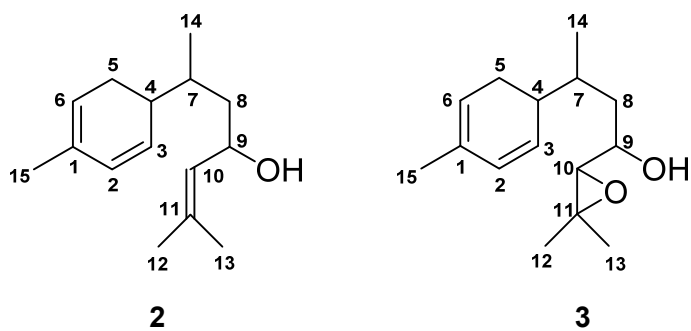

960

961

962 **Figure 3**

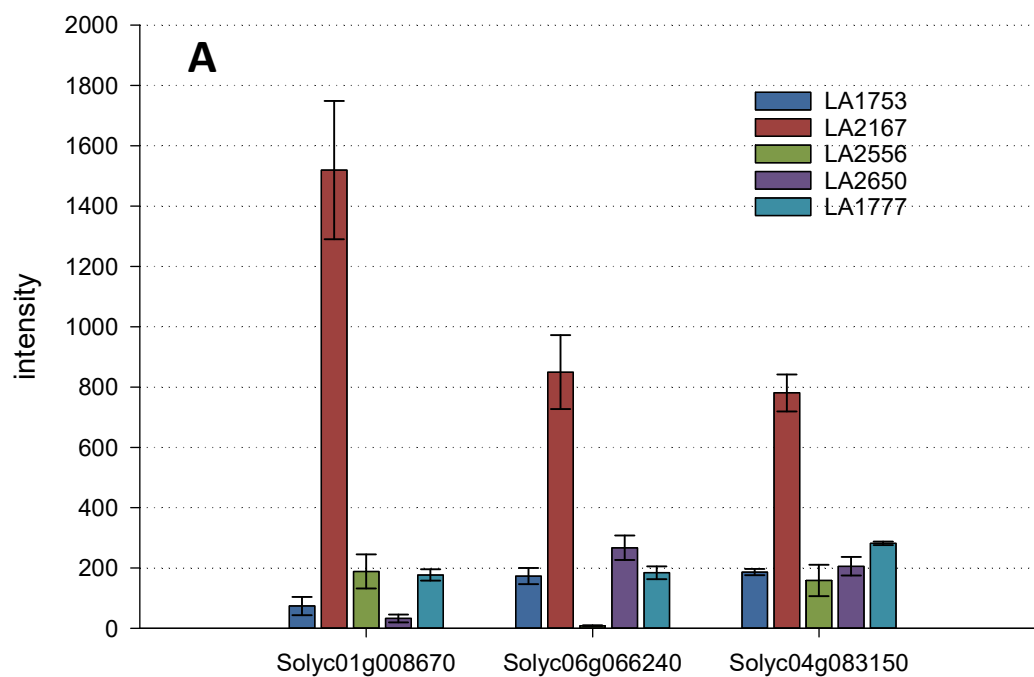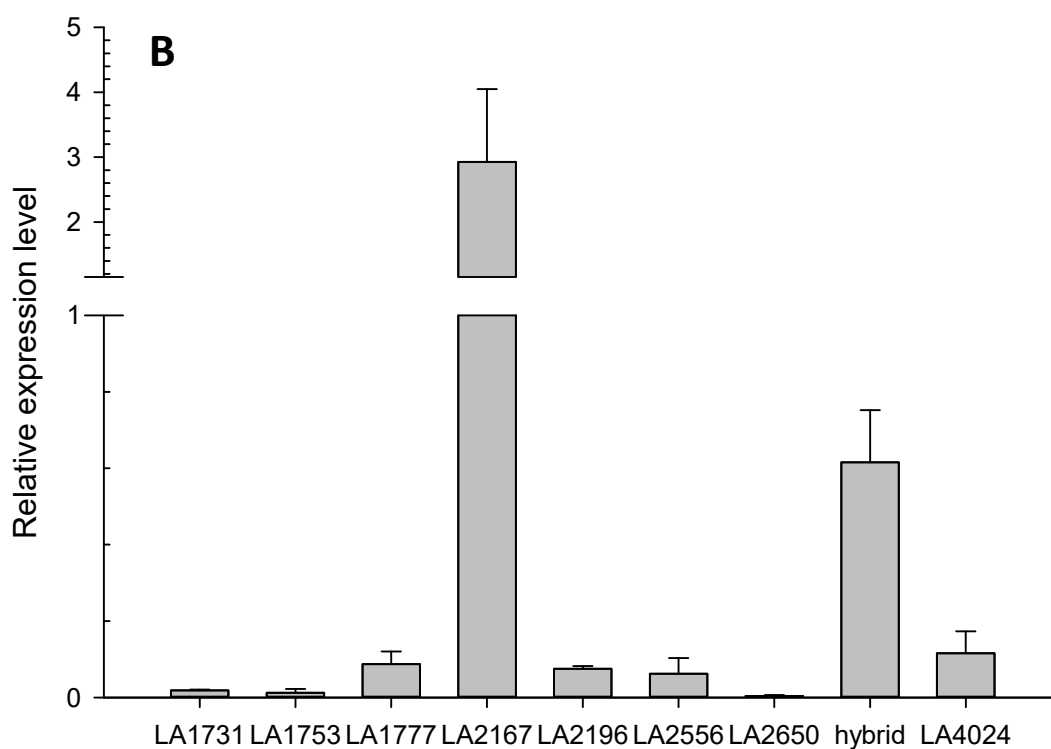

963

964

965 **Figure 4**

966

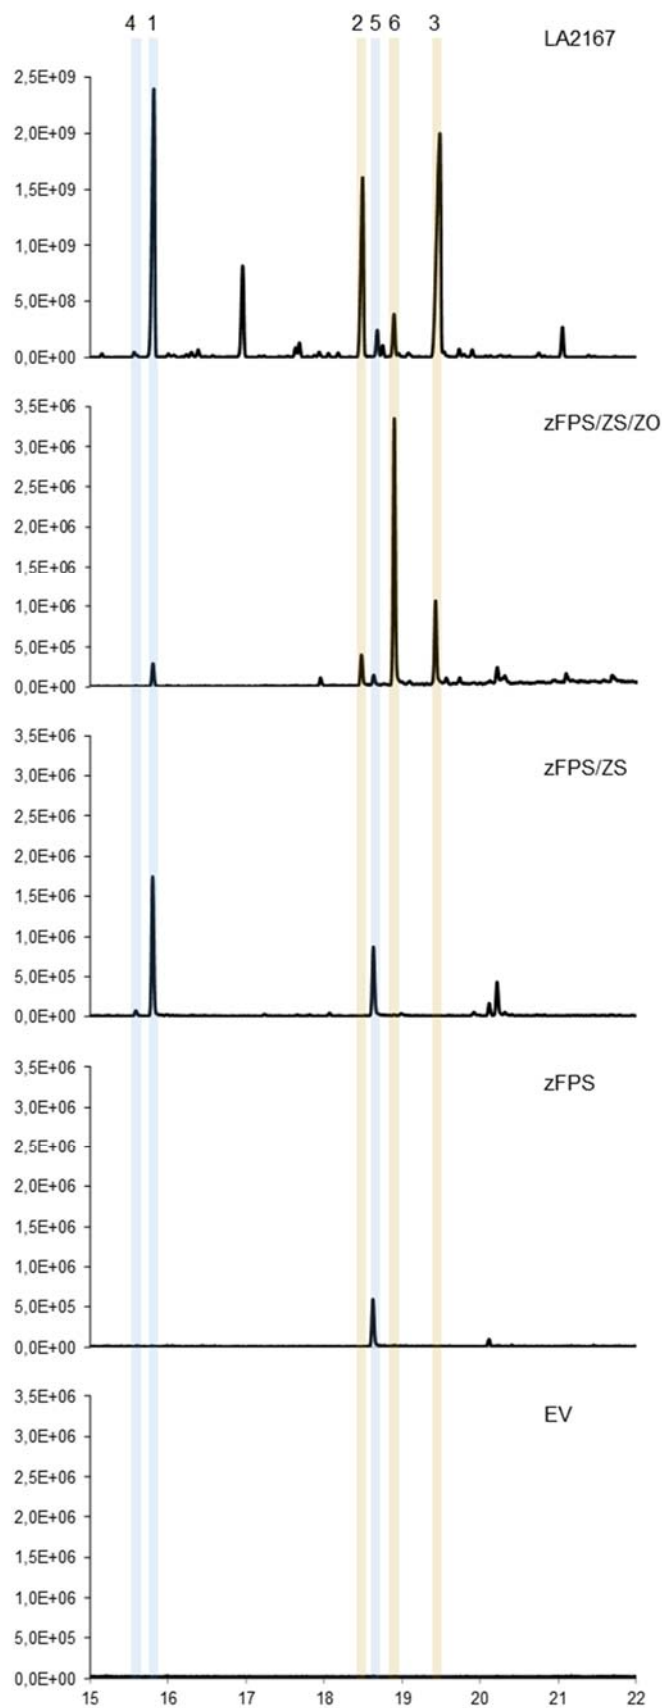

967

968 **Figure 5**

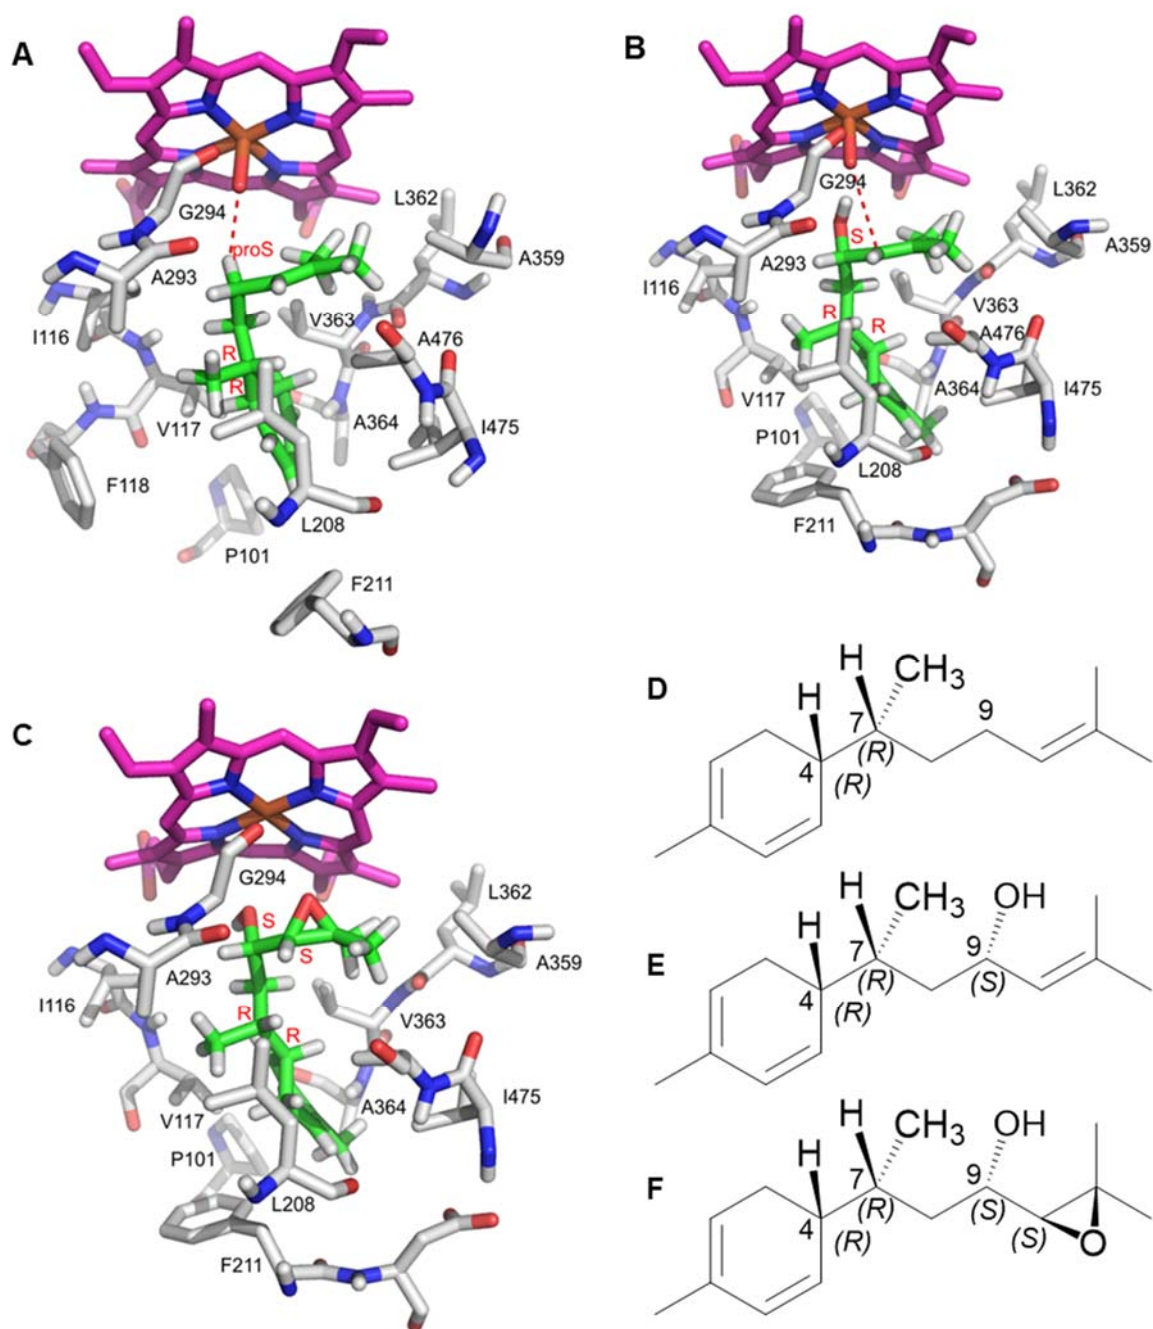

969

970

971 **Figure 6**

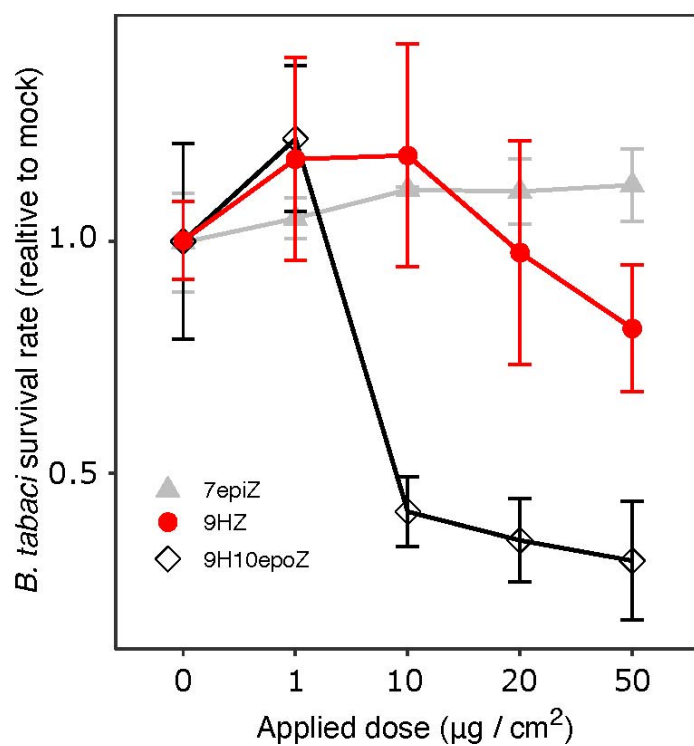

972

973

974 **Figure 7**

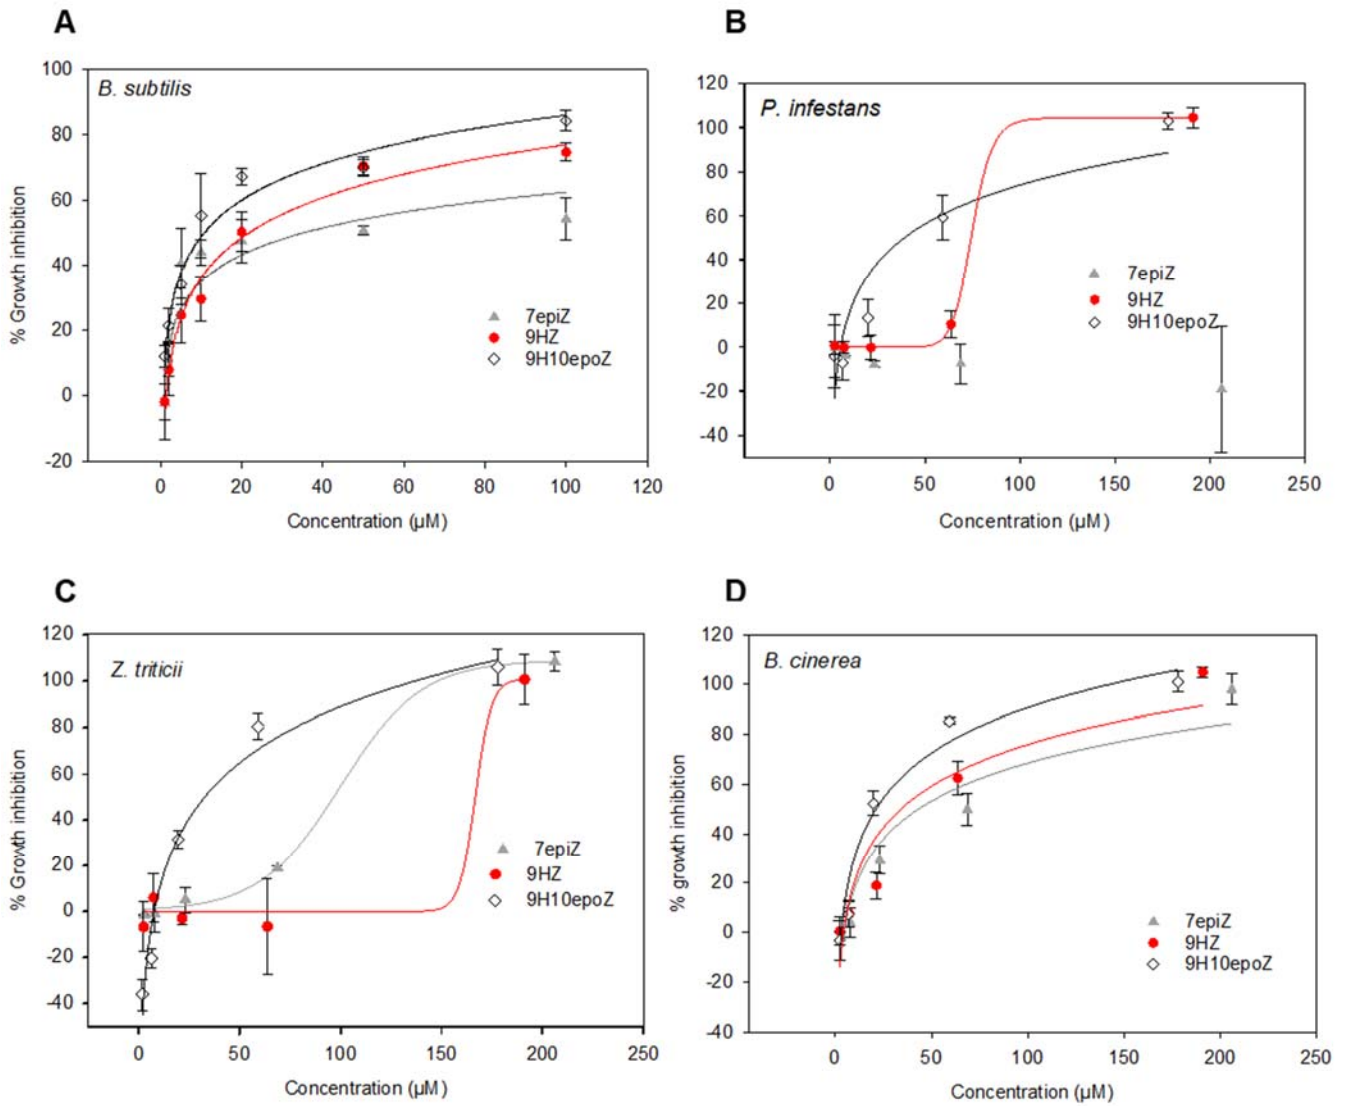

975
